# Supplementary material
Source: Elsevier journal article supplement (https://comptes-rendus.academie-sciences.fr/chimie/article/10.1016/j.crci.2019.10.001/file/attach/mmc1.pdf)

# Reactivity of *N*-Methyl-*N*-(Polyfluorobenzyl)acetamides and *N*-Methyl-*N*-(Polyfluorobenzyl)benzamides in Pd-Catalyzed C–H Bond Arylation

Mohamed Elhadi Benhalouche<sup>a, b, c</sup>, Hai-Yun Huang,<sup>a</sup> Abdellah Miloudi,<sup>b, c</sup> Henri Doucet<sup>a, \*</sup>  
and Jean-François Soulé<sup>a, \*</sup>

<sup>a</sup> *Univ Rennes, CNRS, ISCR UMR 6226, F-35000 Rennes, France*

<sup>b</sup> *Laboratoire de Chimie Fine, Département de Chimie, Faculté des Sciences Exactes et Appliquées, Université Oran1, BP1524 El Mnaouer, Oran 31100, Algeria*

<sup>c</sup> *Département des Classes Préparatoires en Sciences et Technologies, École Nationale Polytechnique d'Oran-Maurice Audin, BP1523 El Mnaouer, Oran 31100, Algeria*

## Copy of <sup>1</sup>H and <sup>13</sup>C NMR Spectra

---

\* Corresponding author. e-mail: [henri.doucet@univ-rennes1.fr](mailto:henri.doucet@univ-rennes1.fr)

\* Corresponding author. e-mail: [jean-francois.soule@univ-rennes1.fr](mailto:jean-francois.soule@univ-rennes1.fr)

# $^1\text{H}$ and $^{13}\text{C}$ NMR spectra of **c**

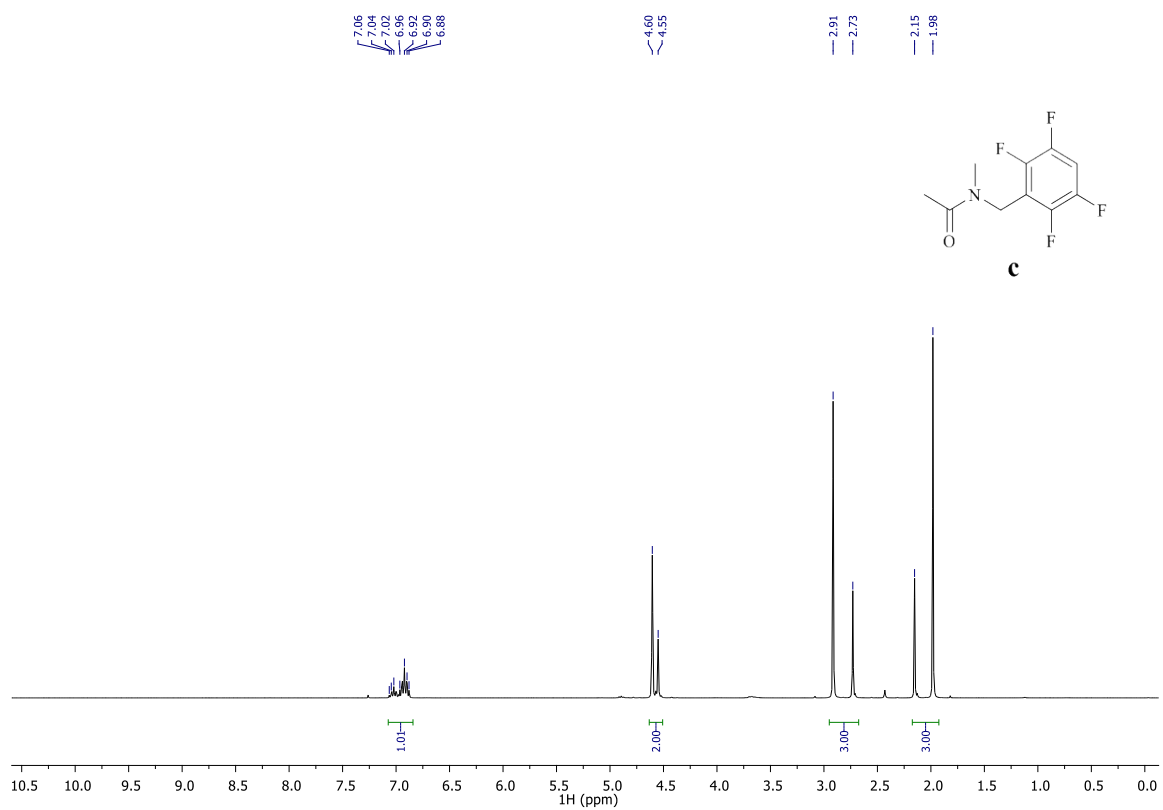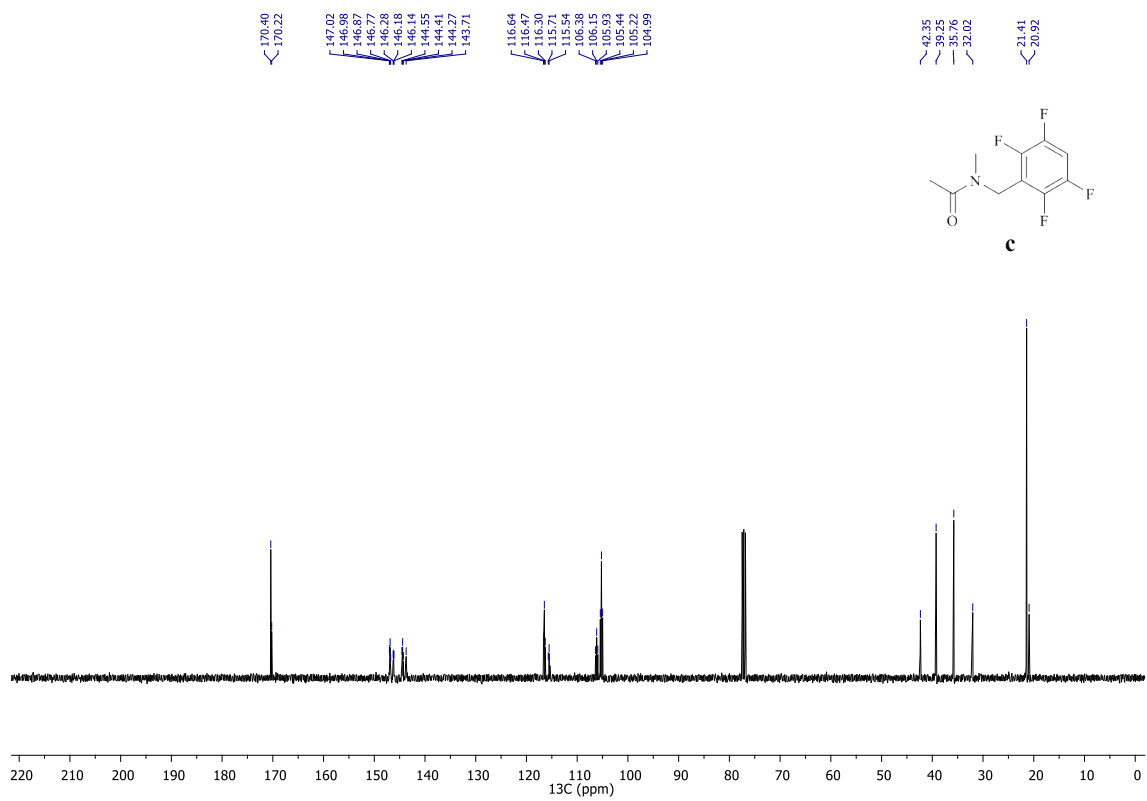

# $^1\text{H}$ and $^{13}\text{C}$ NMR spectra of **d**

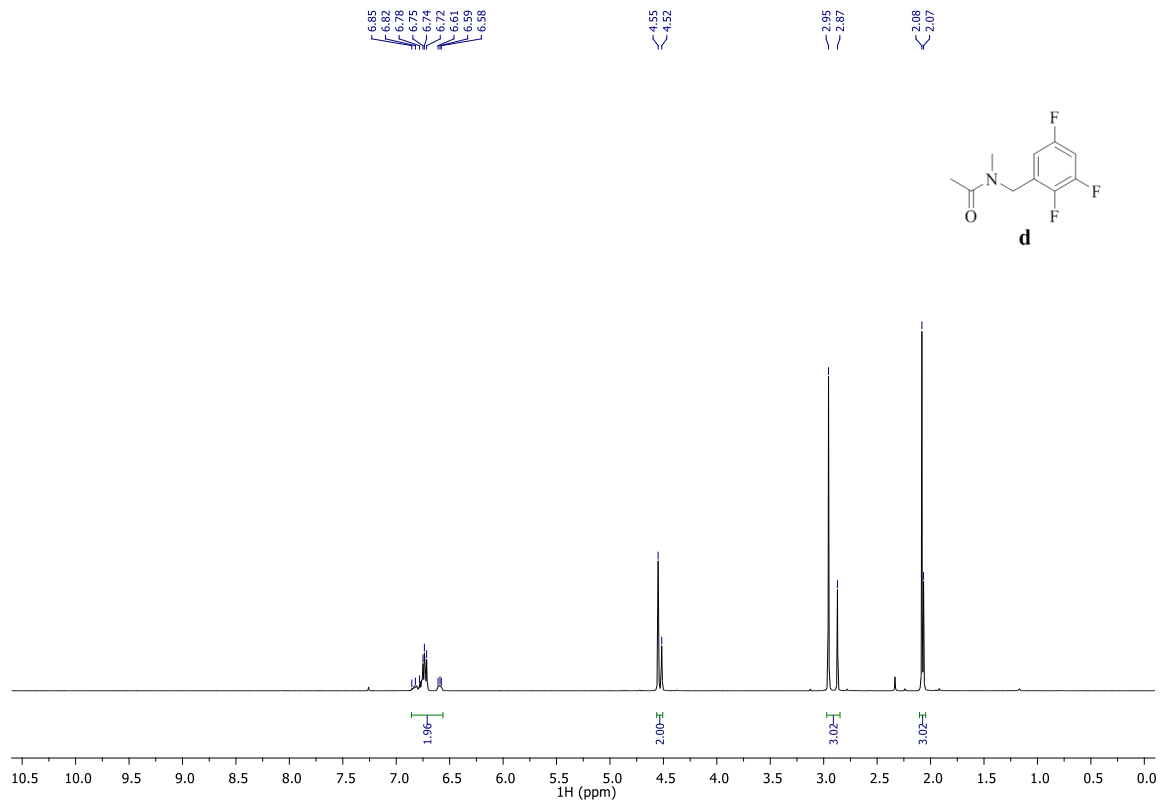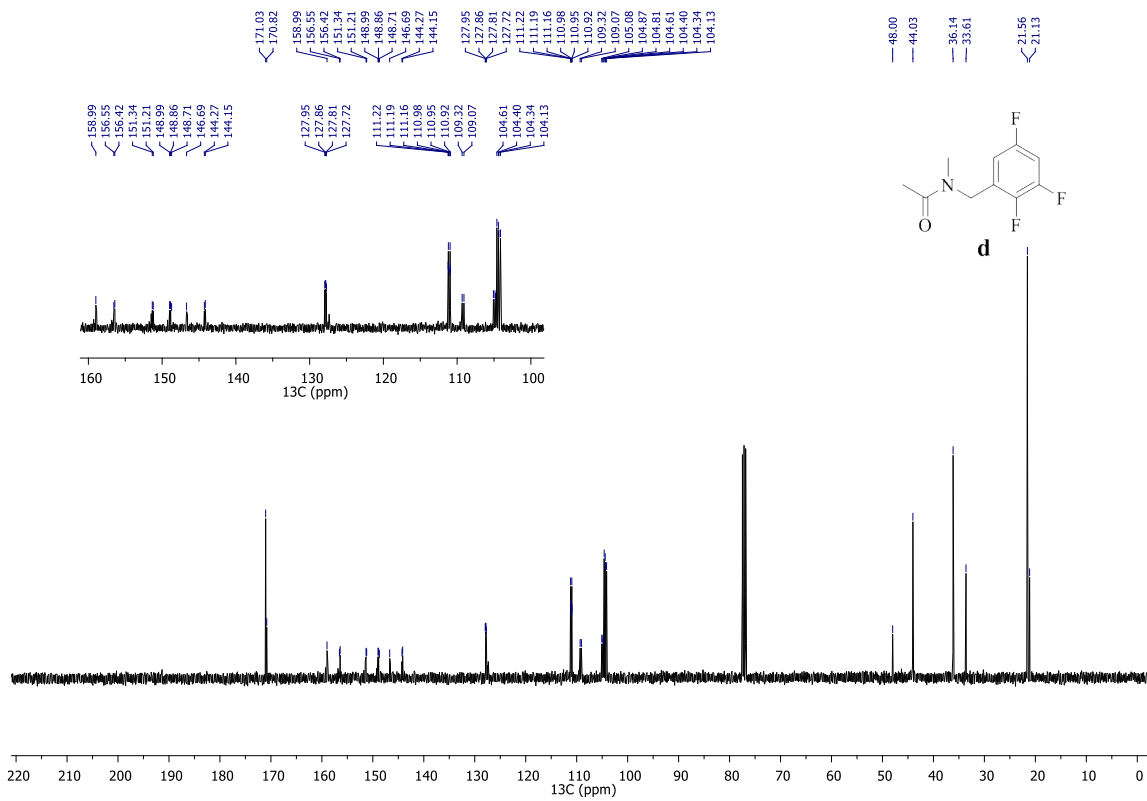

# $^1\text{H}$ and $^{13}\text{C}$ NMR spectra of e

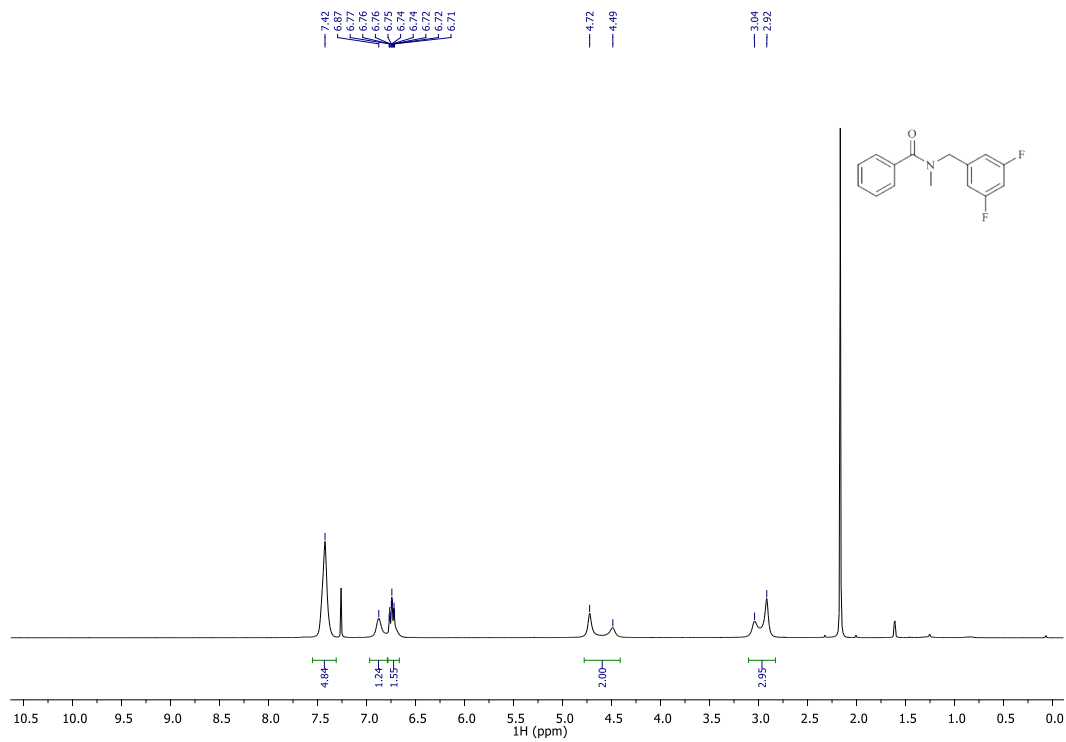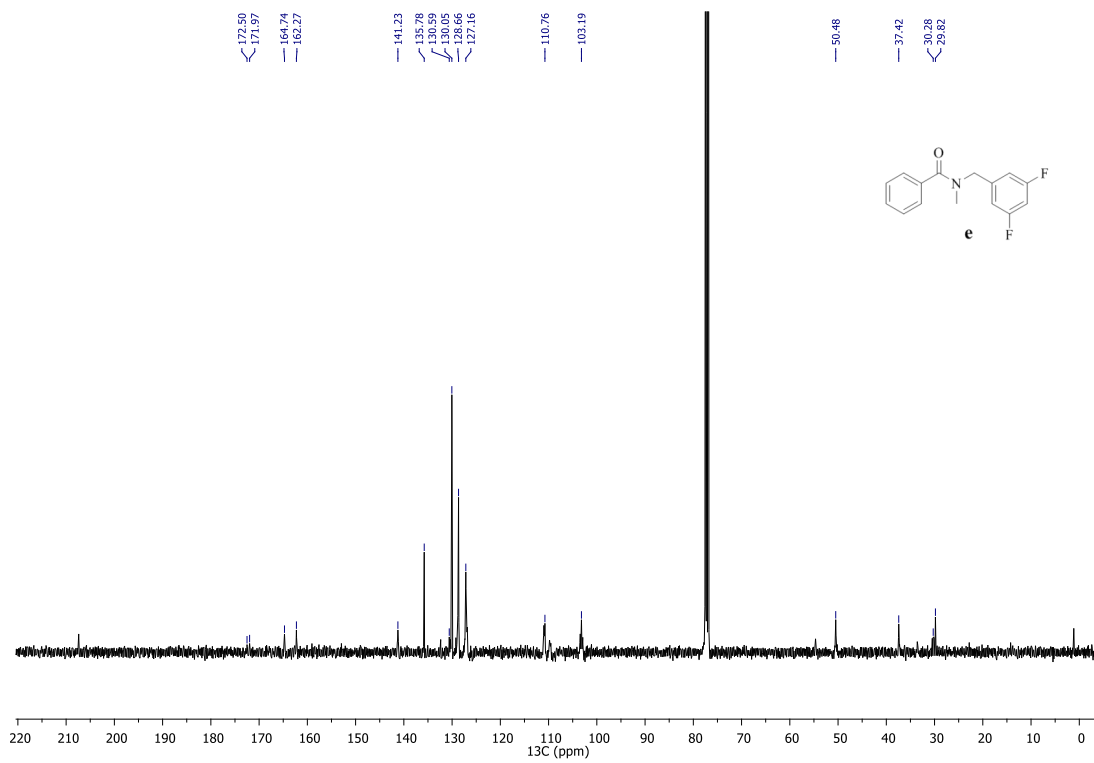



# $^1\text{H}$ and $^{13}\text{C}$ NMR spectra of **1c**

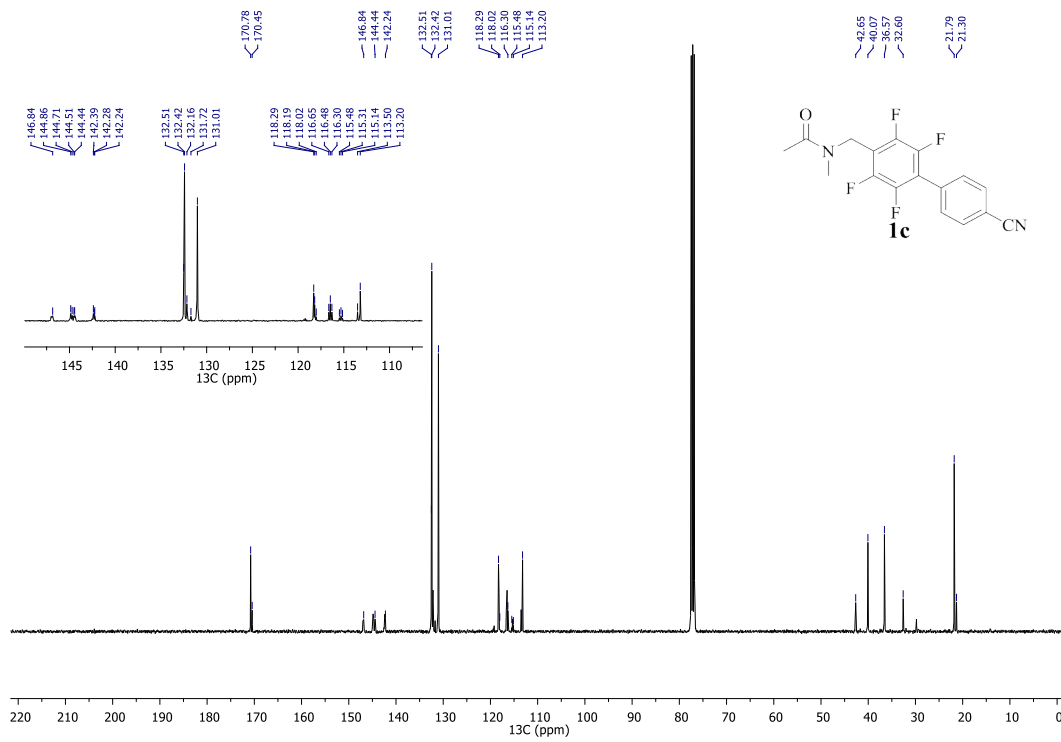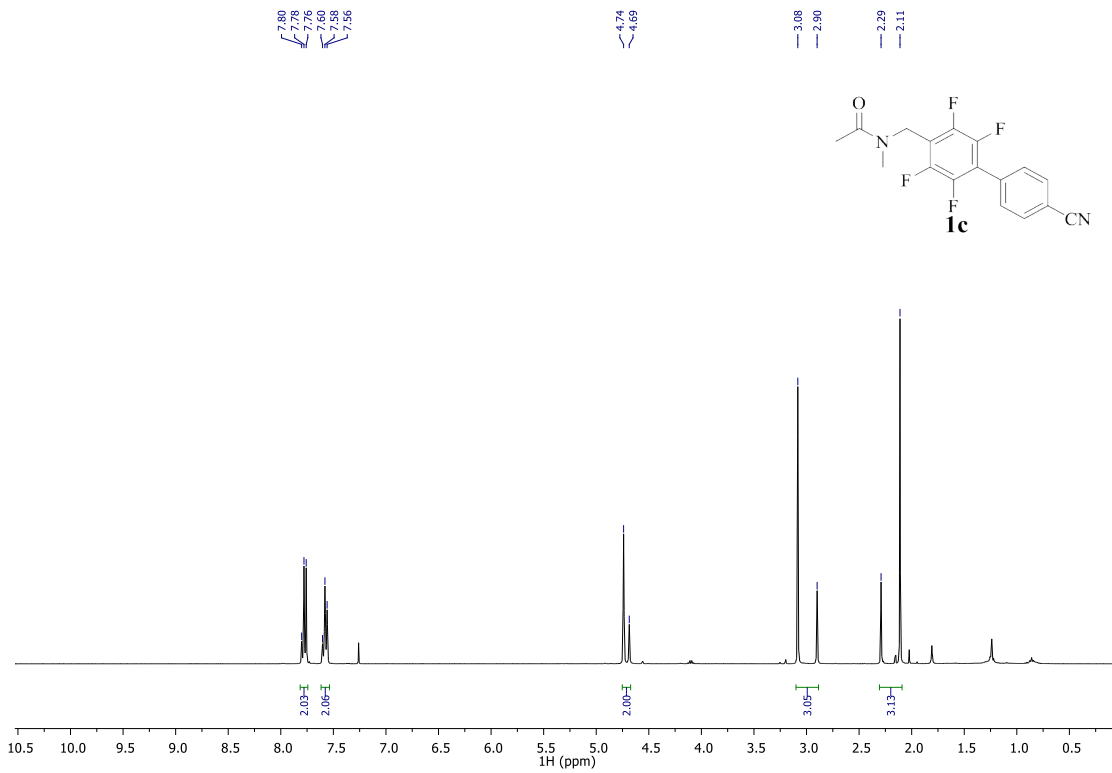

# $^1\text{H}$ and $^{13}\text{C}$ NMR spectra of **2**

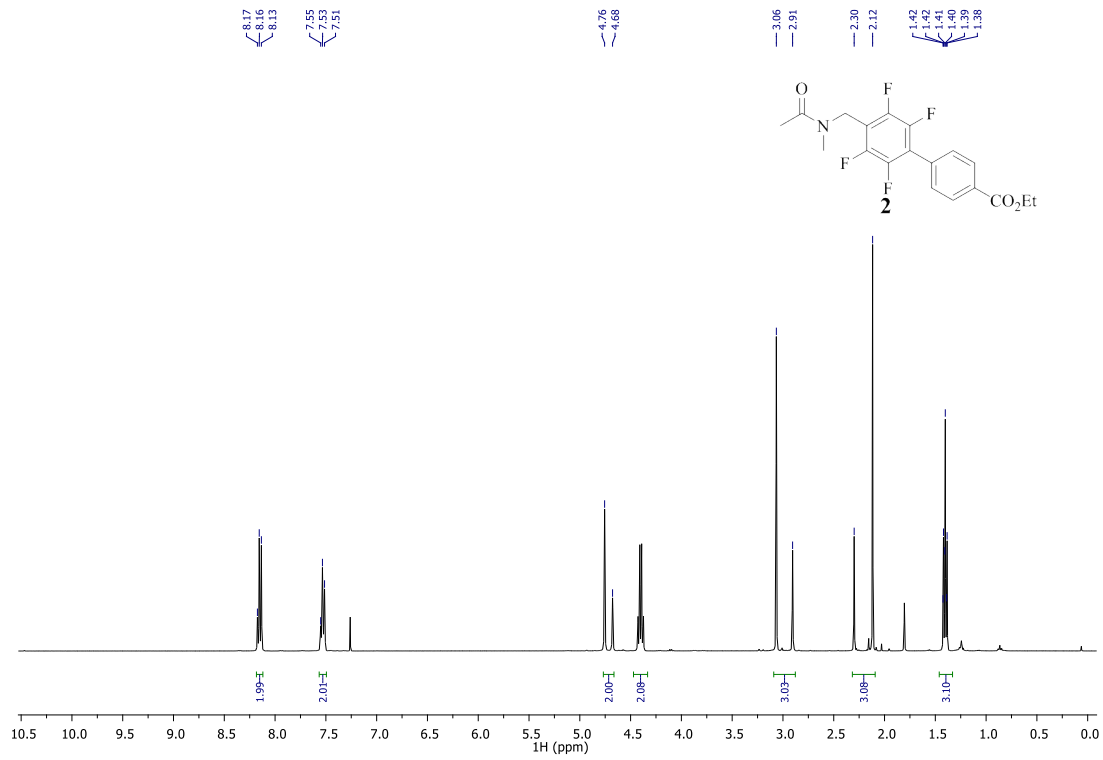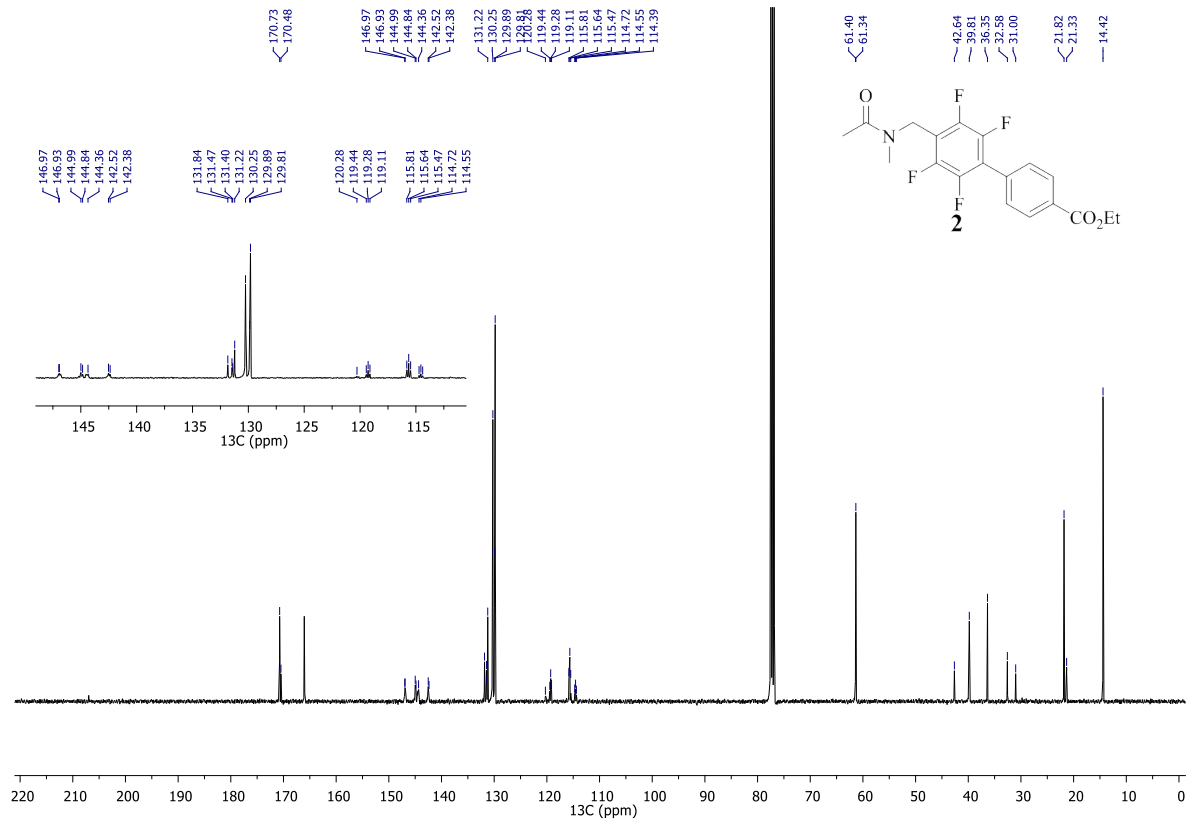

# $^1\text{H}$ and $^{13}\text{C}$ NMR spectra of **3**

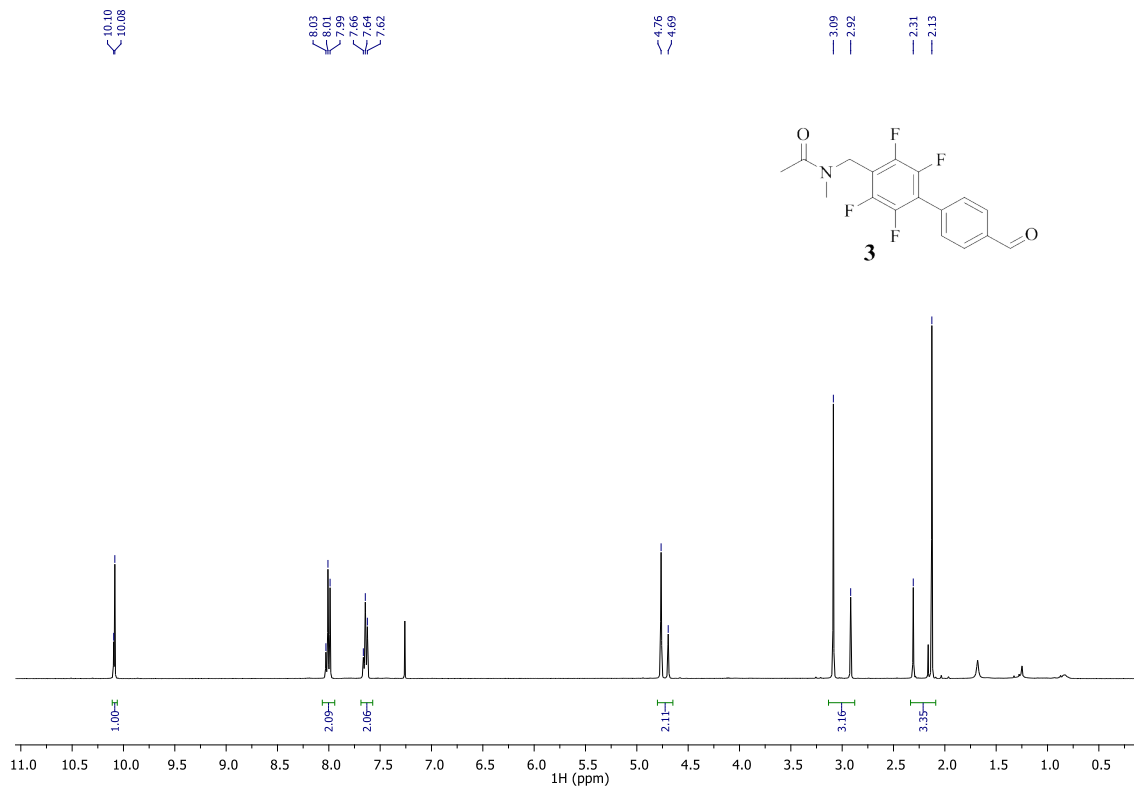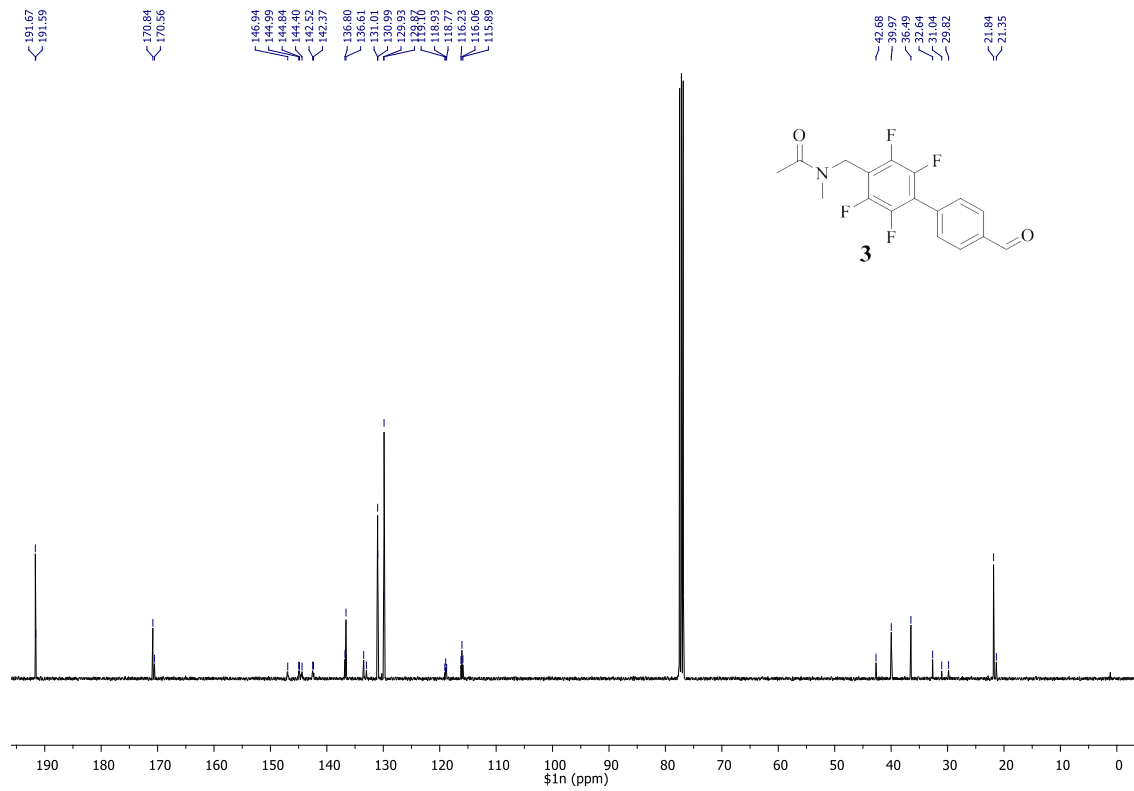



# $^1\text{H}$ and $^{13}\text{C}$ NMR spectra of **4**

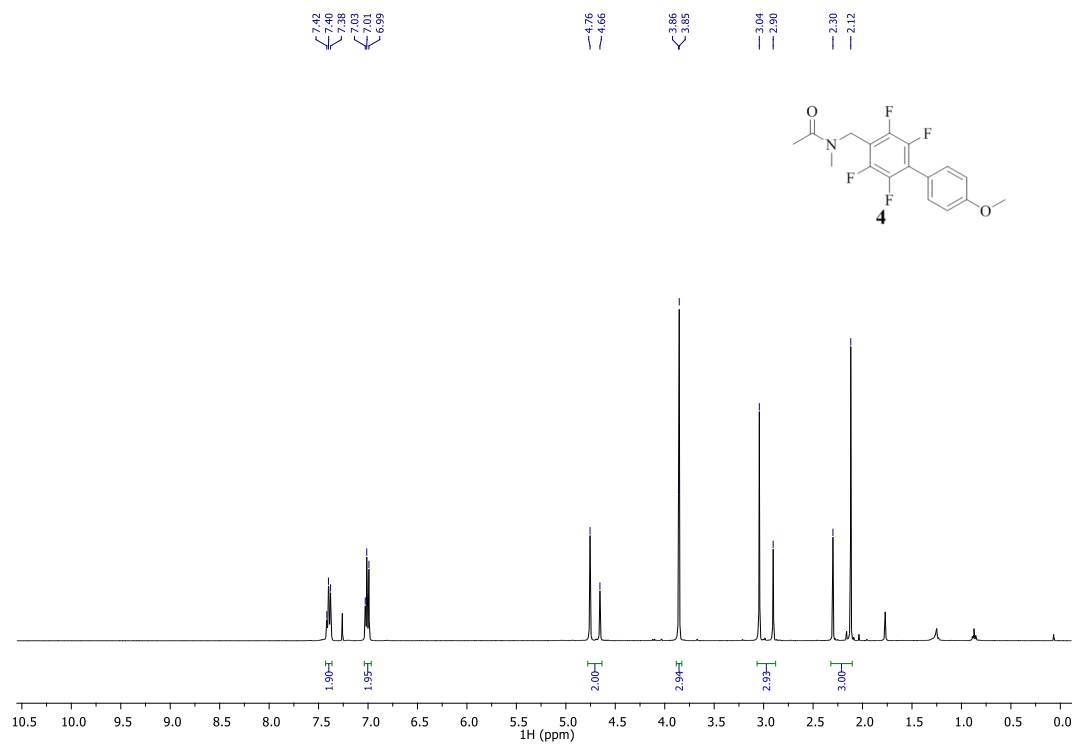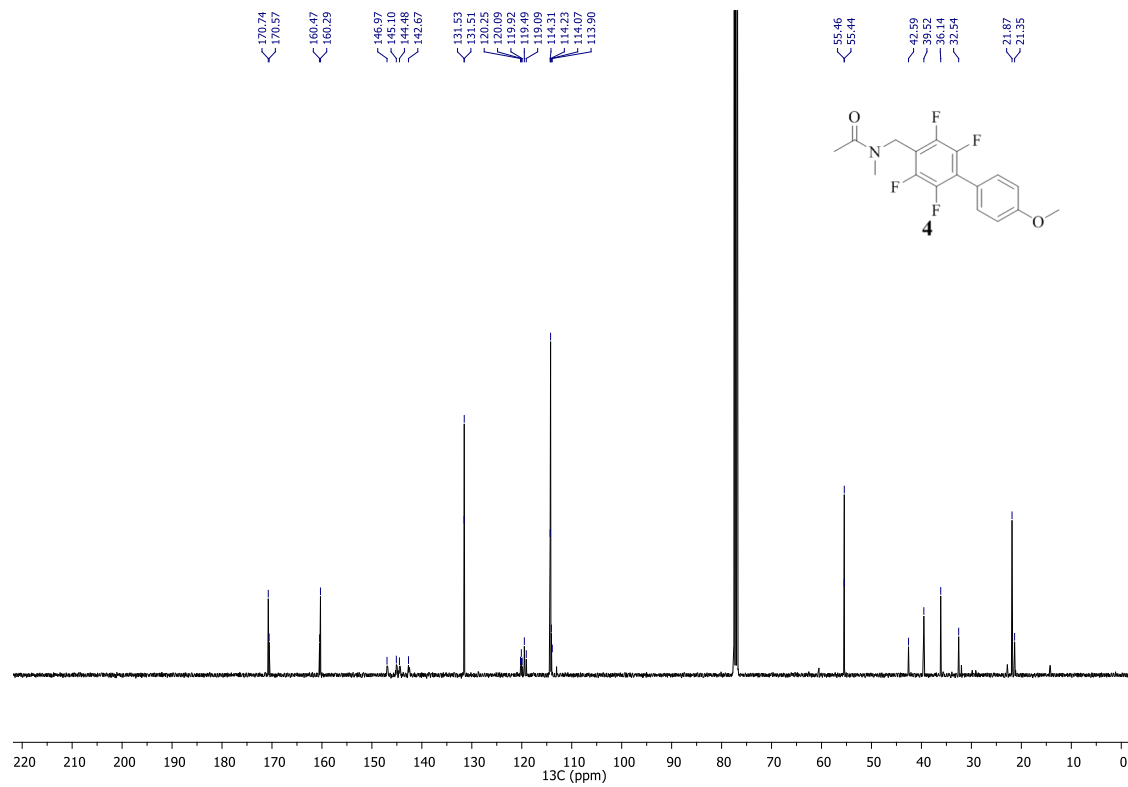

# $^1\text{H}$ and $^{13}\text{C}$ NMR spectra of **5**

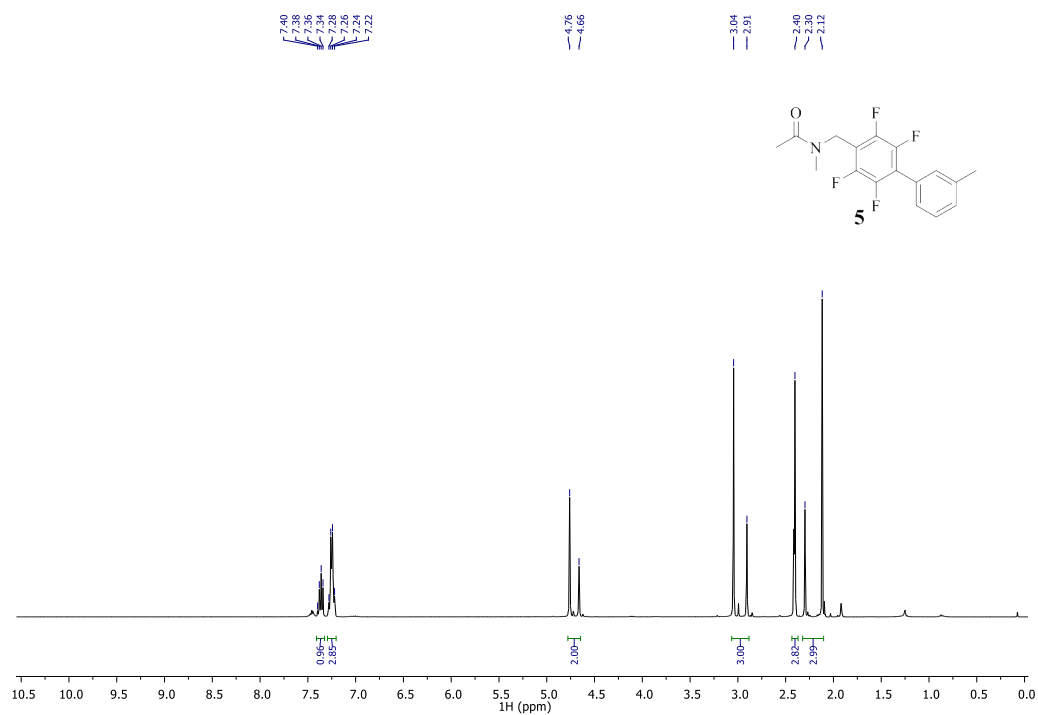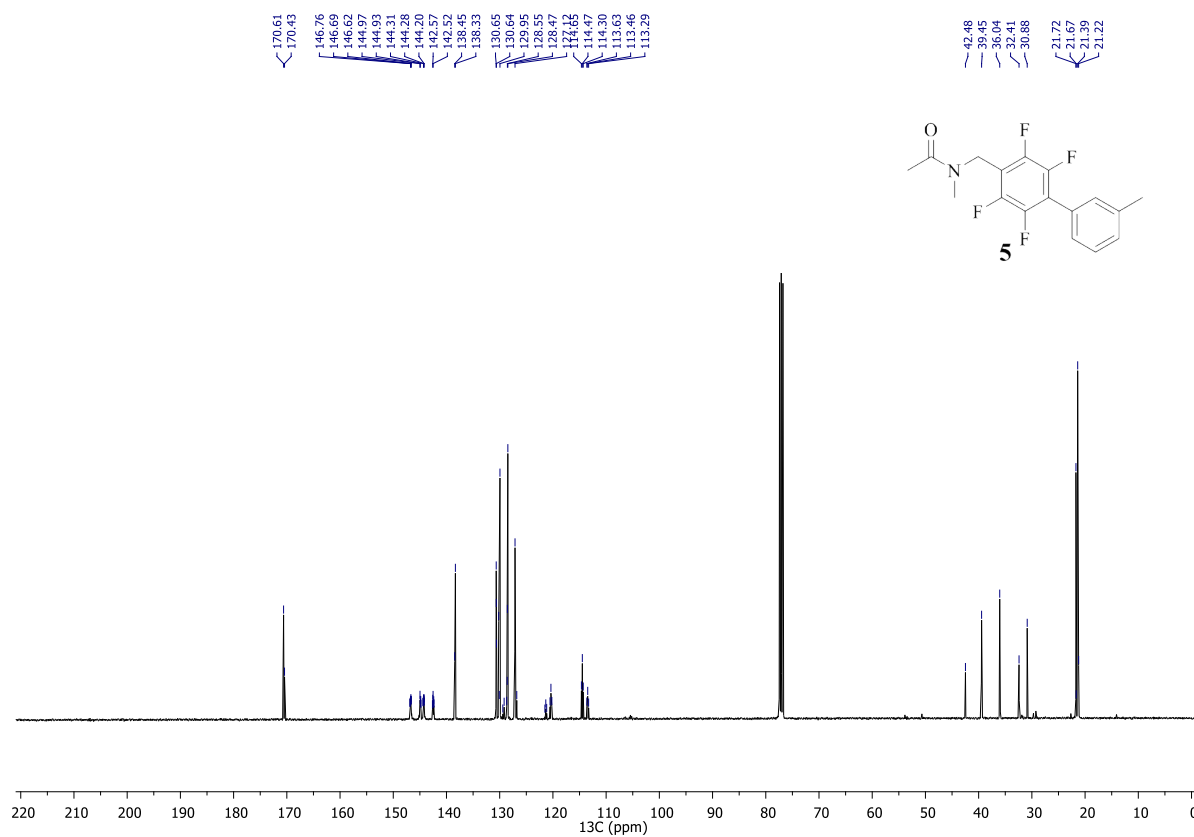

# $^1\text{H}$ and $^{13}\text{C}$ NMR spectra of **6**

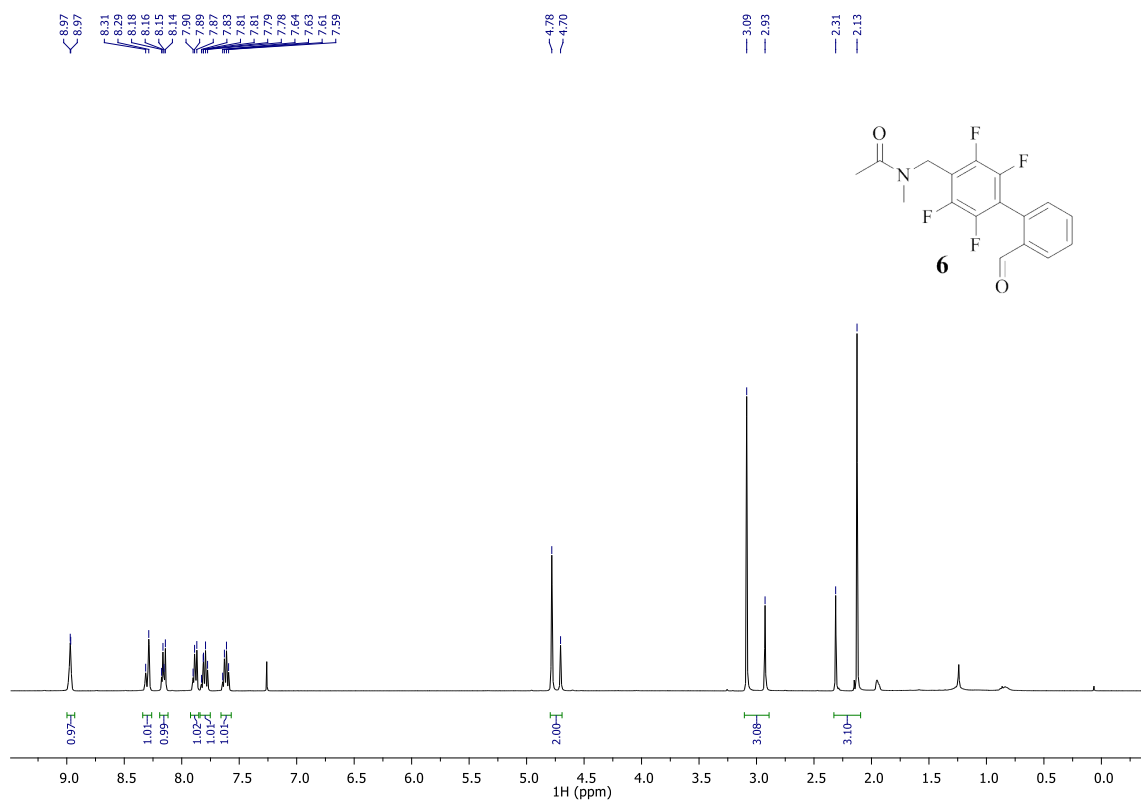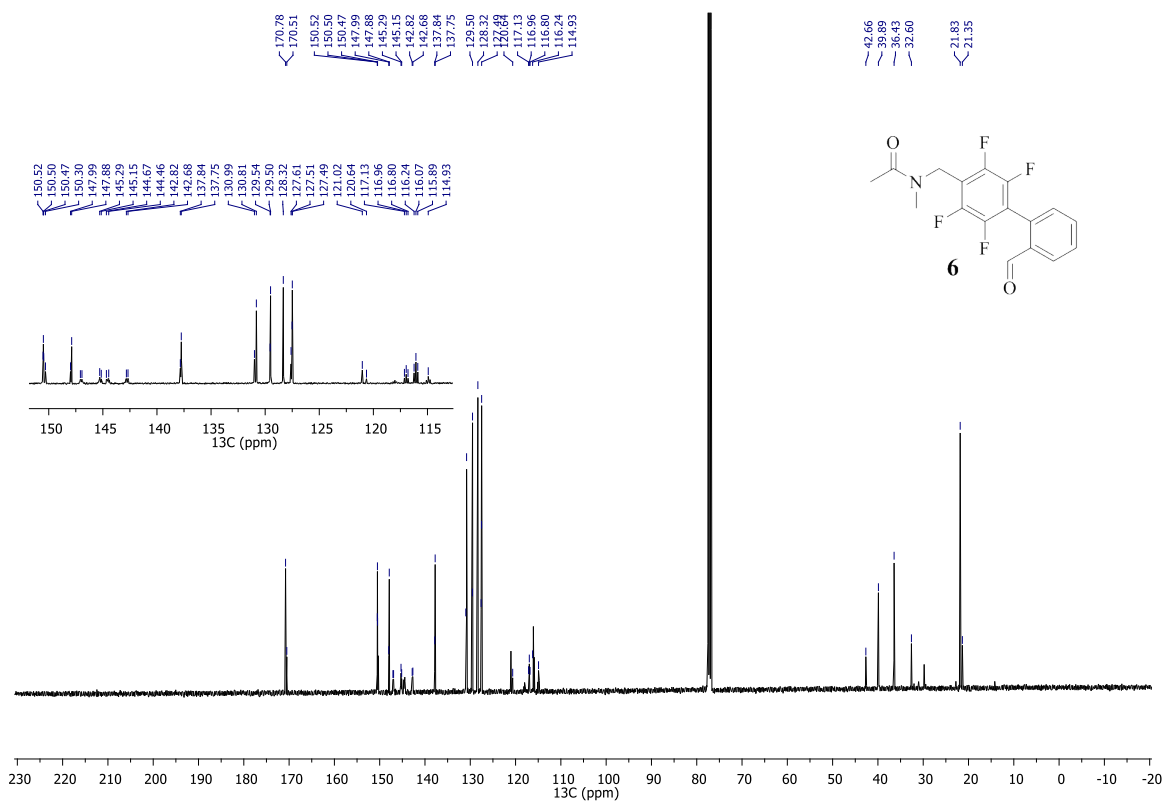

# $^1\text{H}$ and $^{13}\text{C}$ NMR spectra of 7

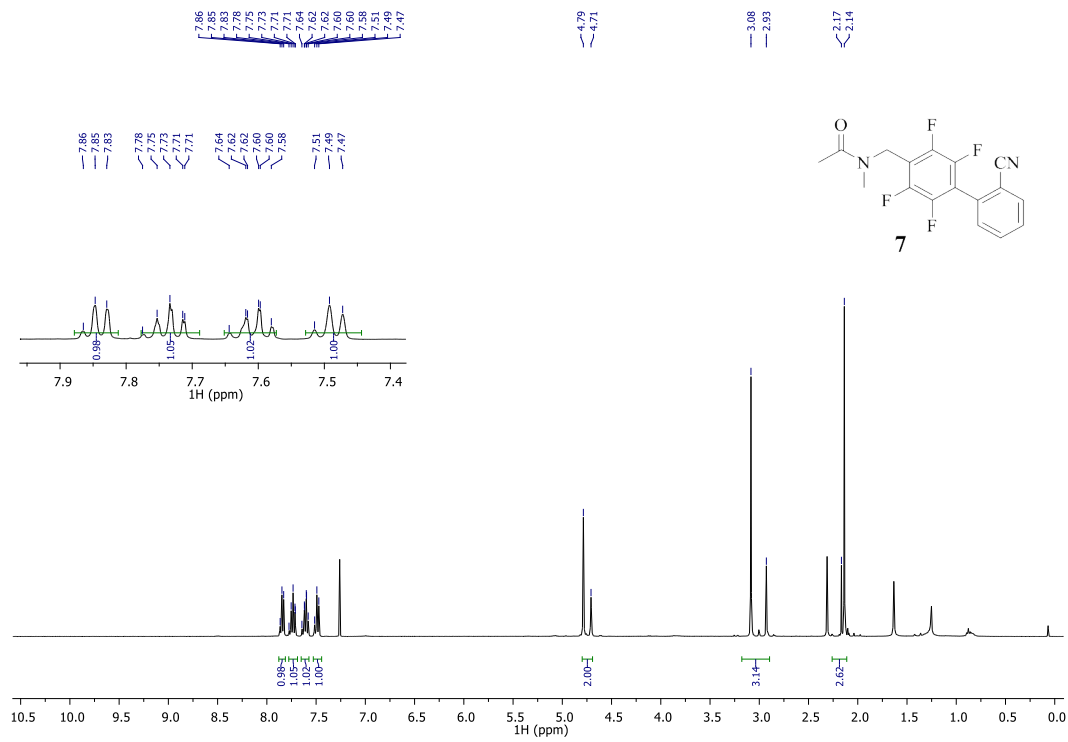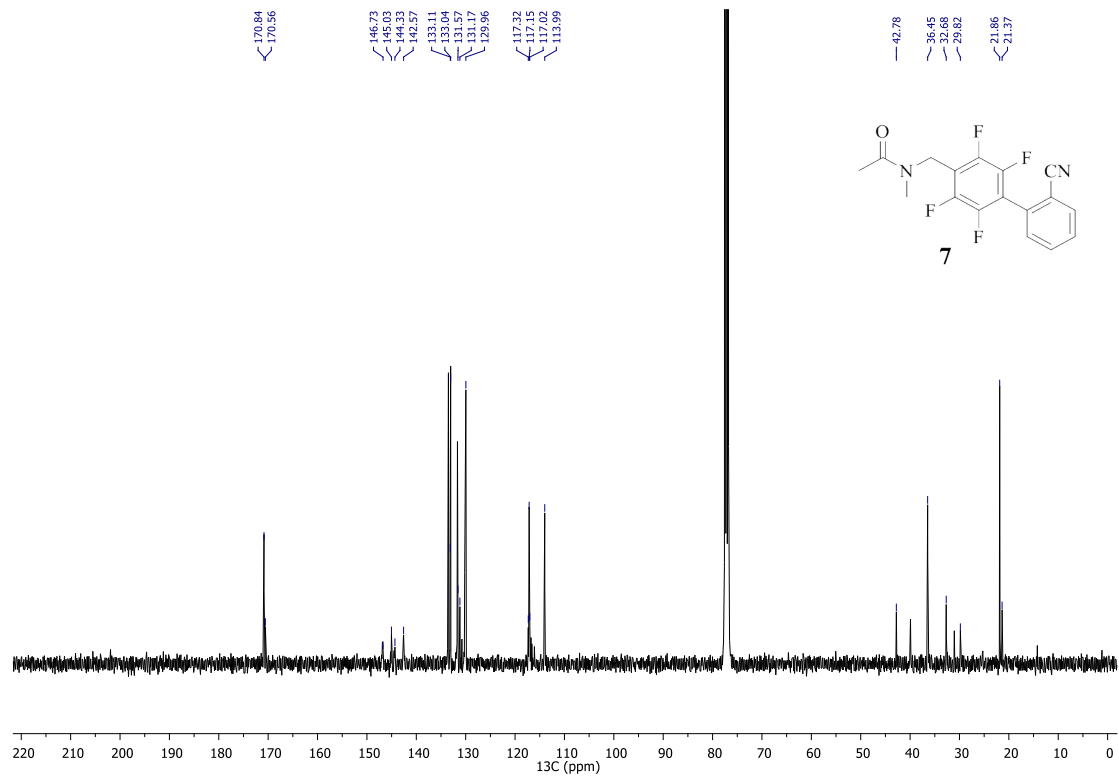

# $^1\text{H}$ and $^{13}\text{C}$ NMR spectra of **8**

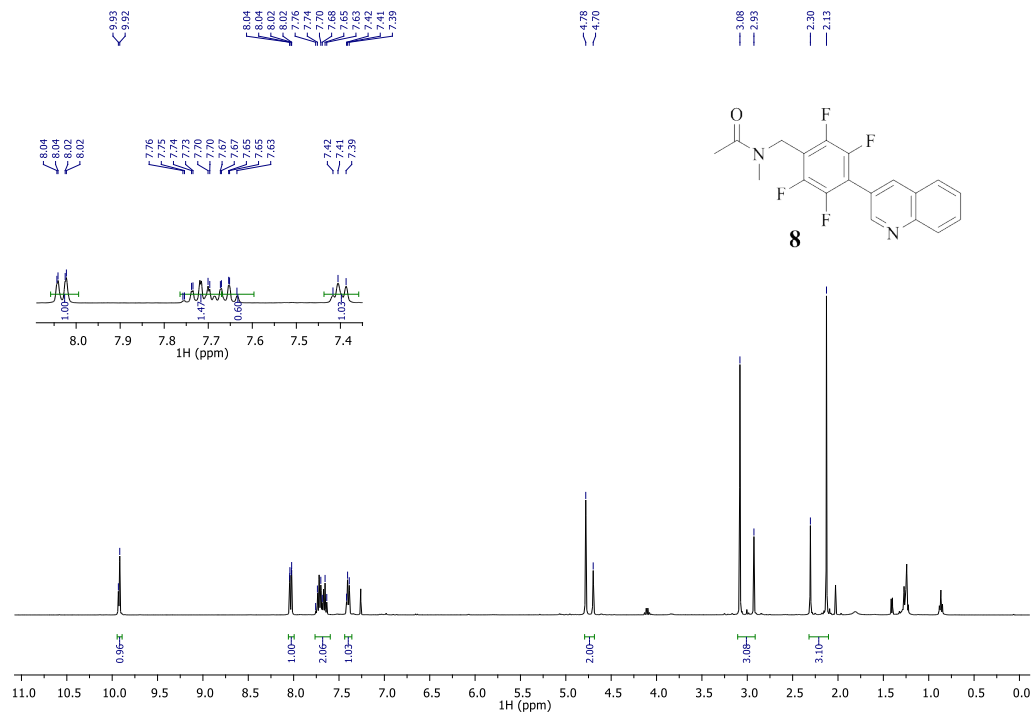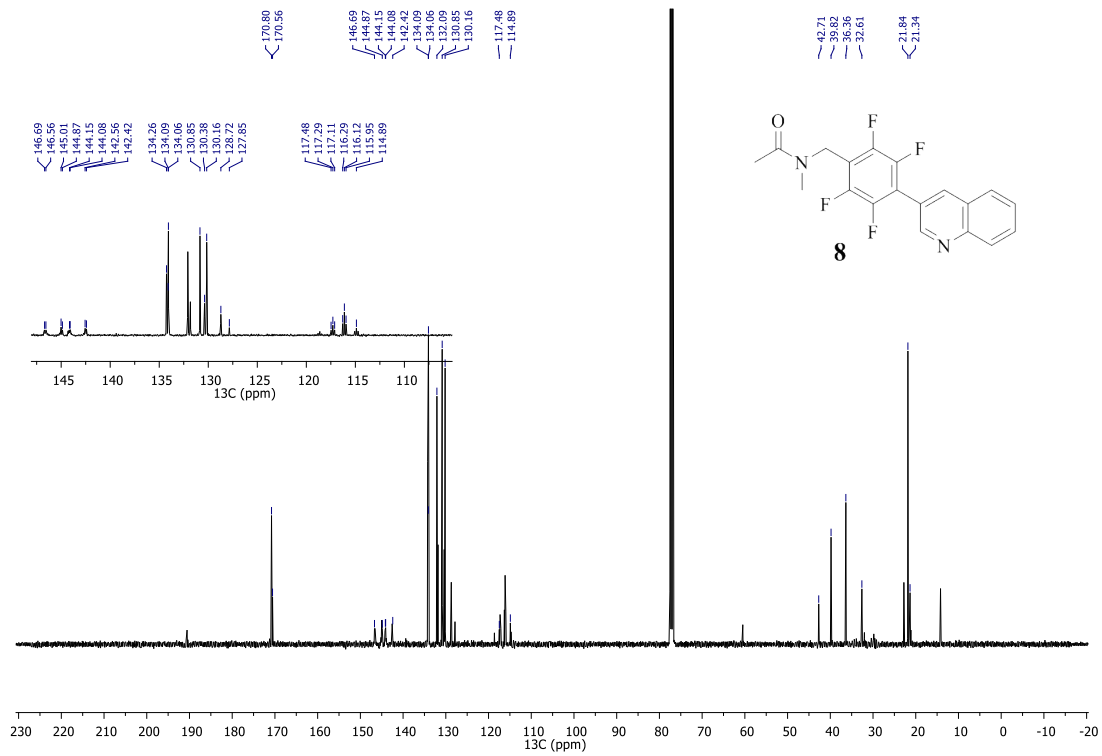

# $^1\text{H}$ and $^{13}\text{C}$ NMR spectra of **9**

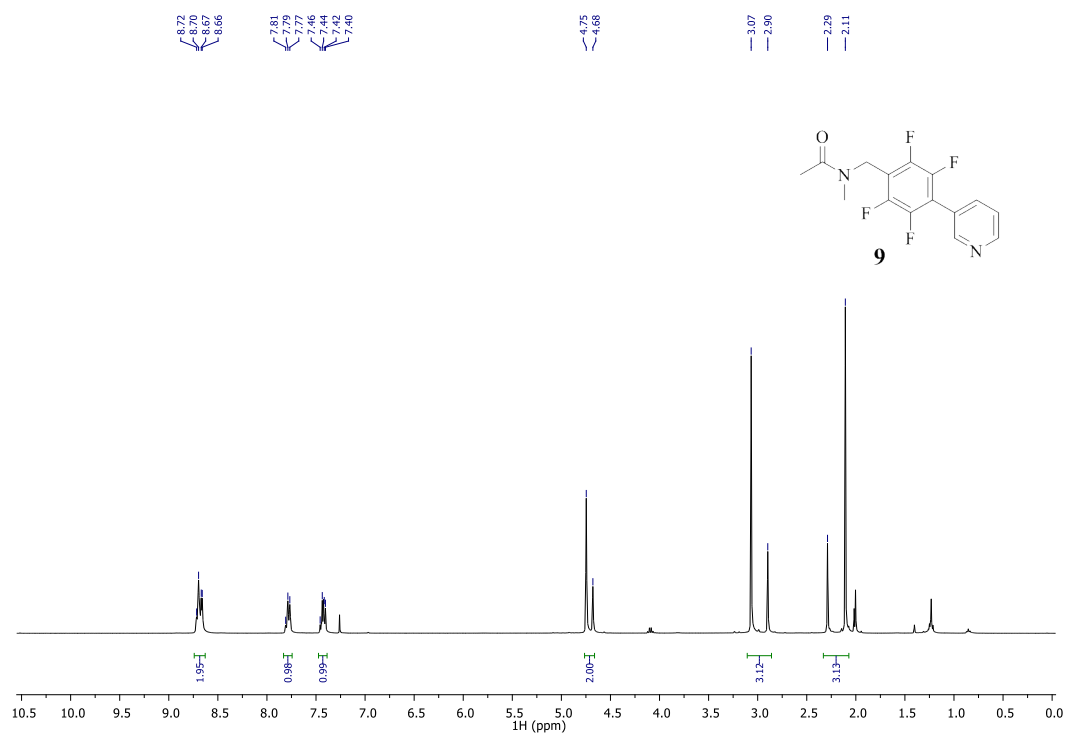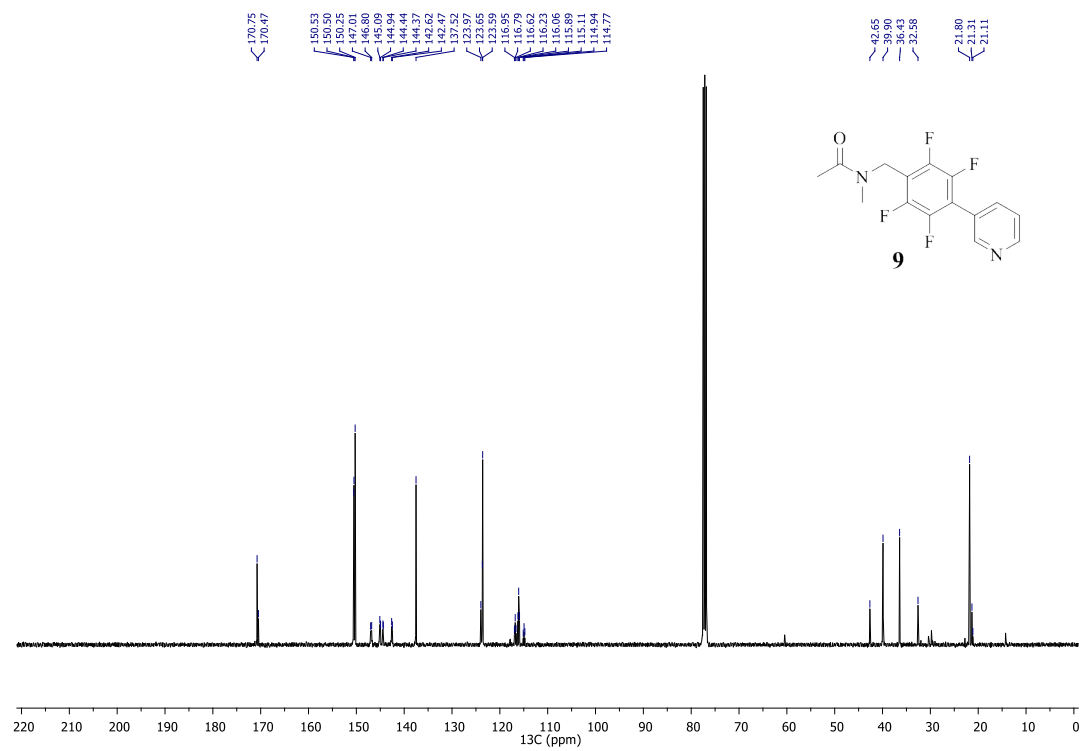

# $^1\text{H}$ and $^{13}\text{C}$ NMR spectra of **10**

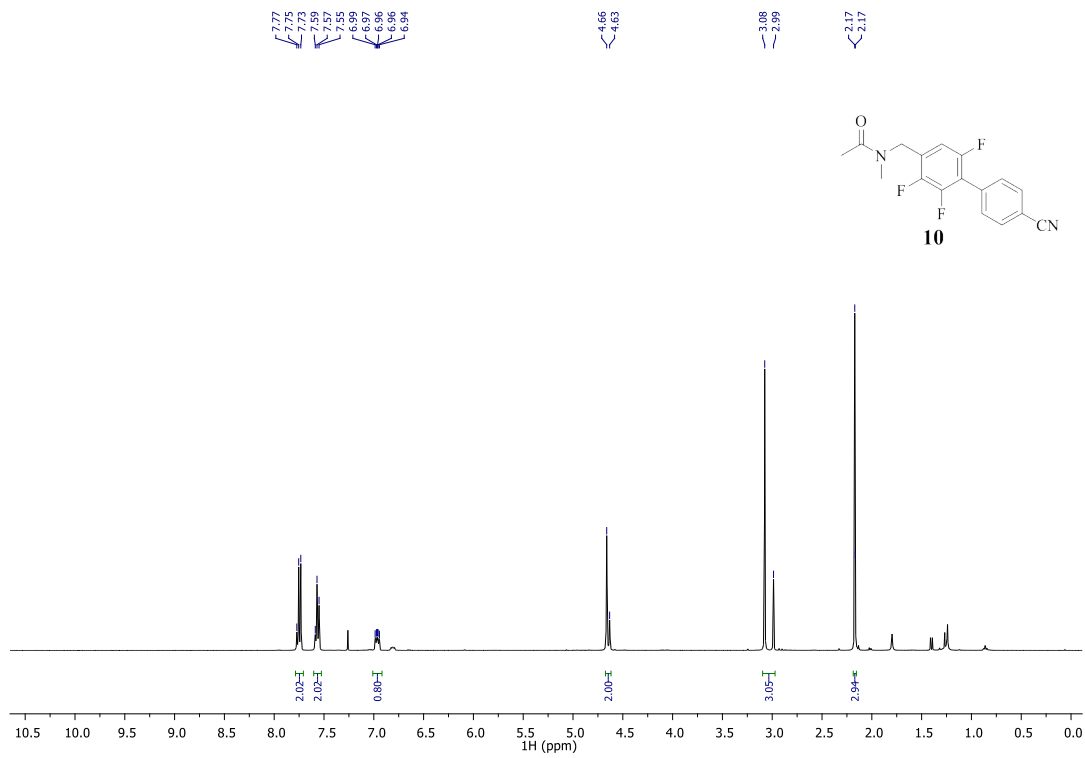

mhenhalouche BM50

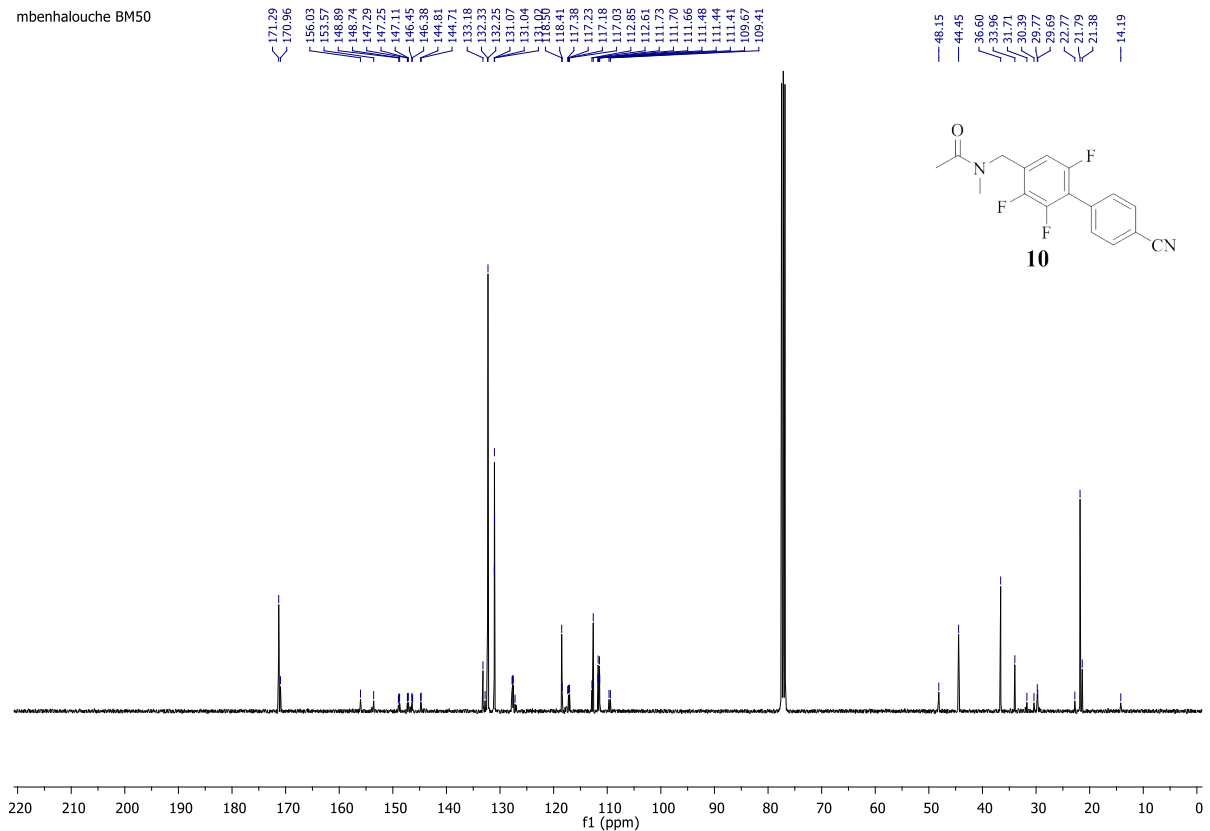

# $^1\text{H}$ and $^{13}\text{C}$ NMR spectra of **11**

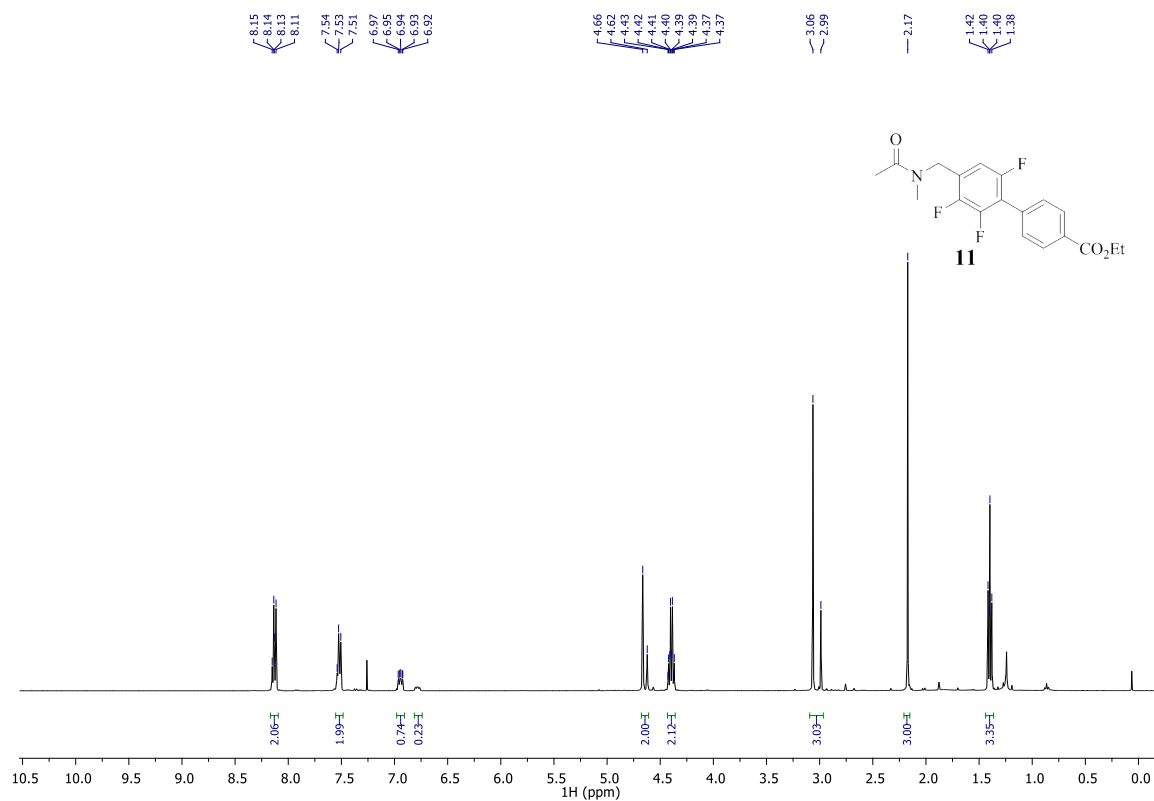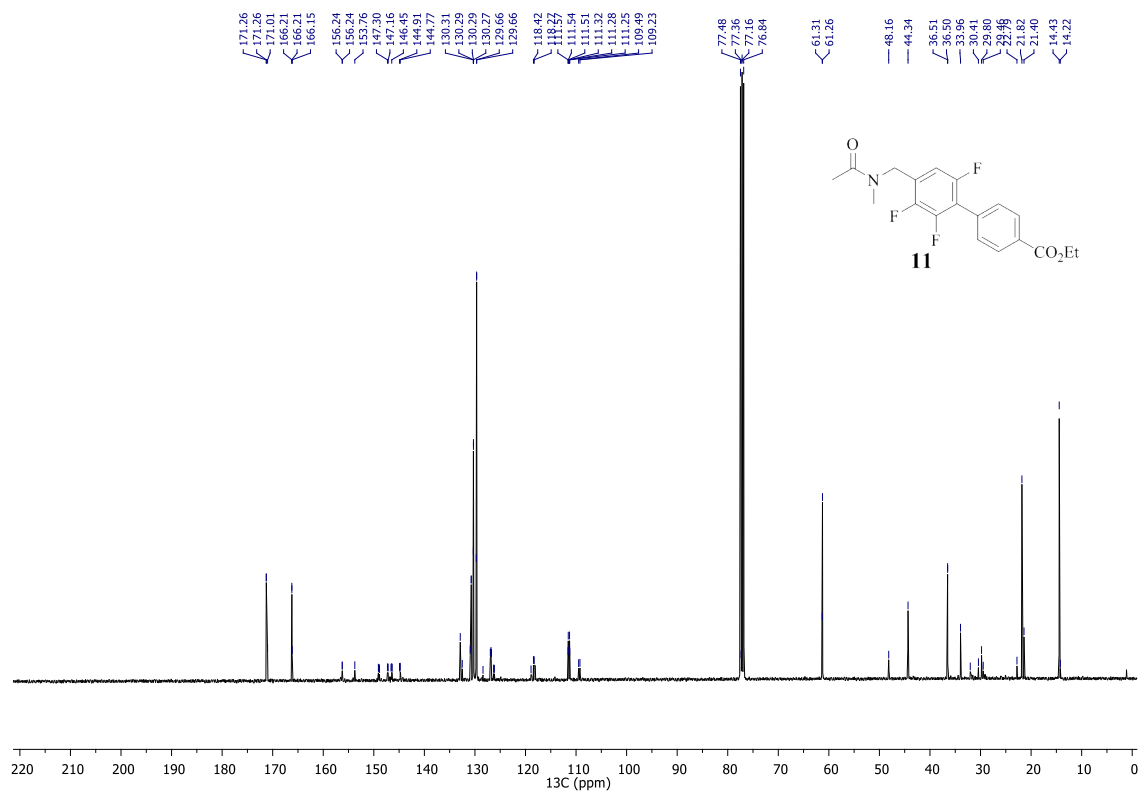



# $^1\text{H}$ and $^{13}\text{C}$ NMR spectra of **12**

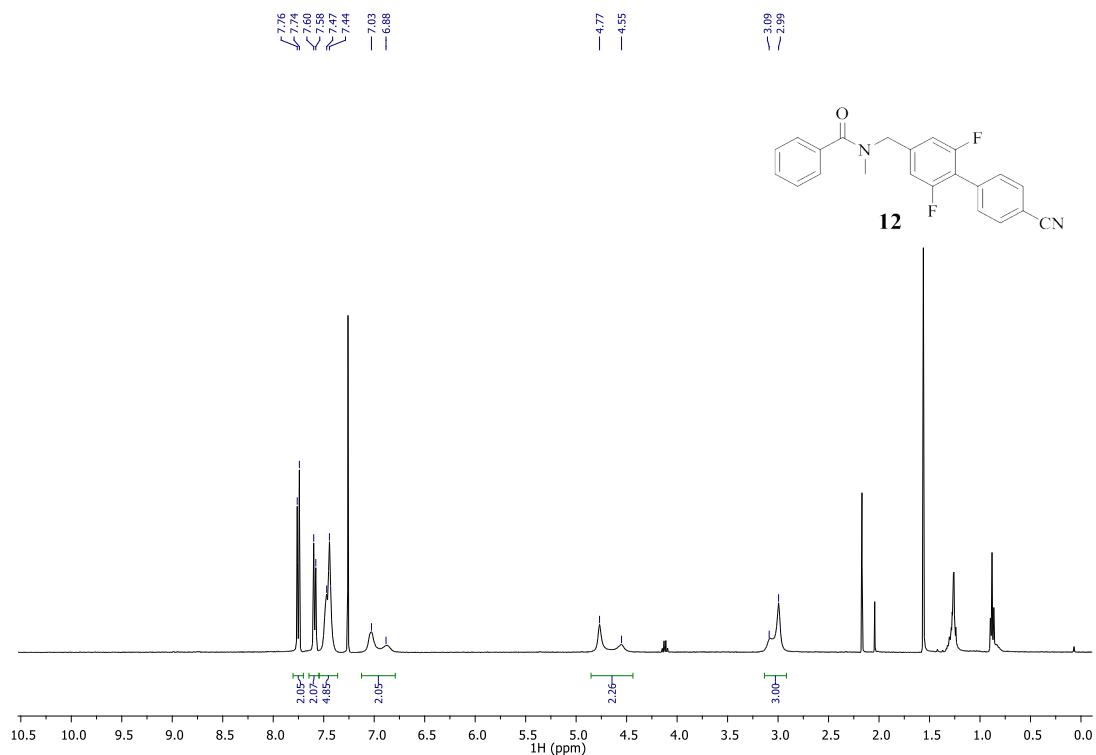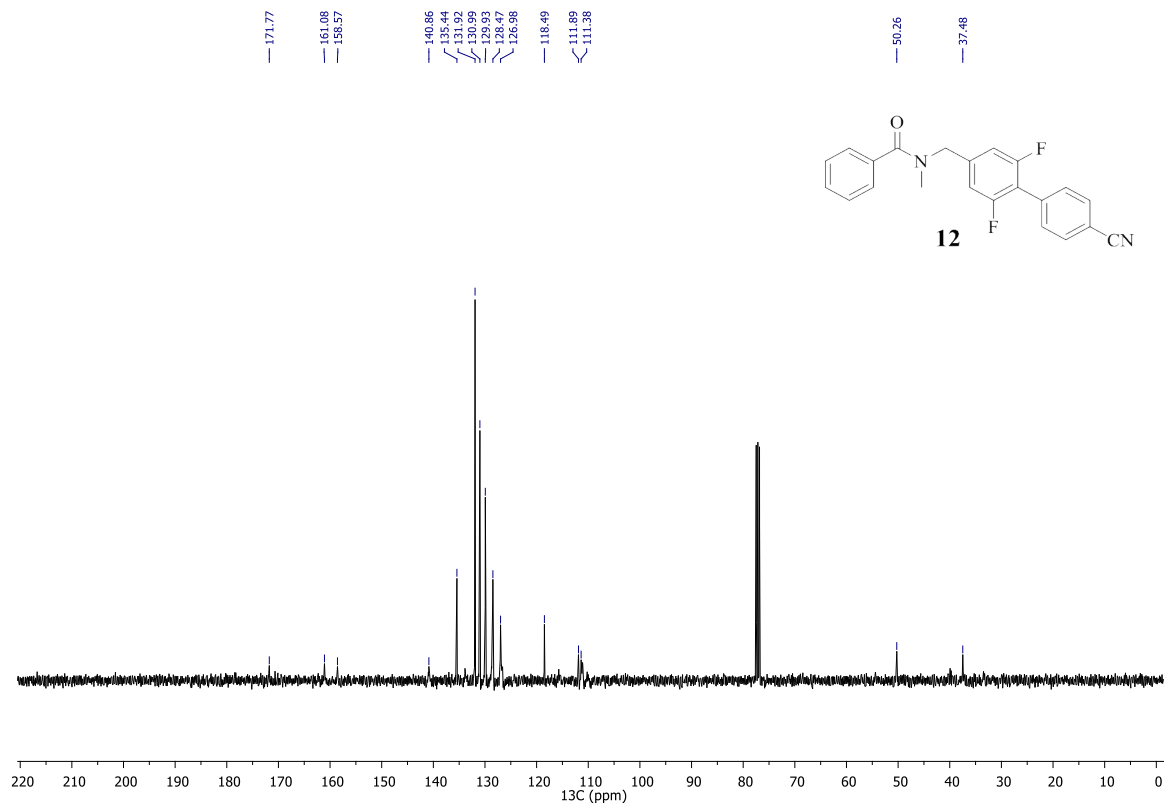

# $^1\text{H}$ and $^{13}\text{C}$ NMR spectra of **13**

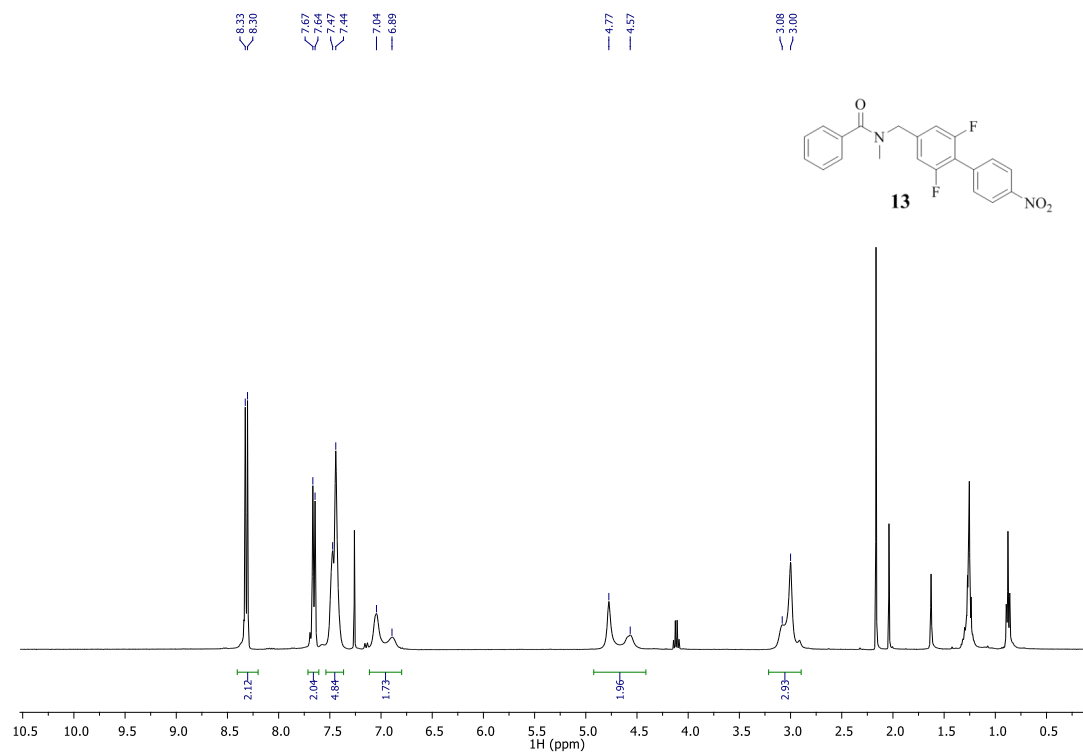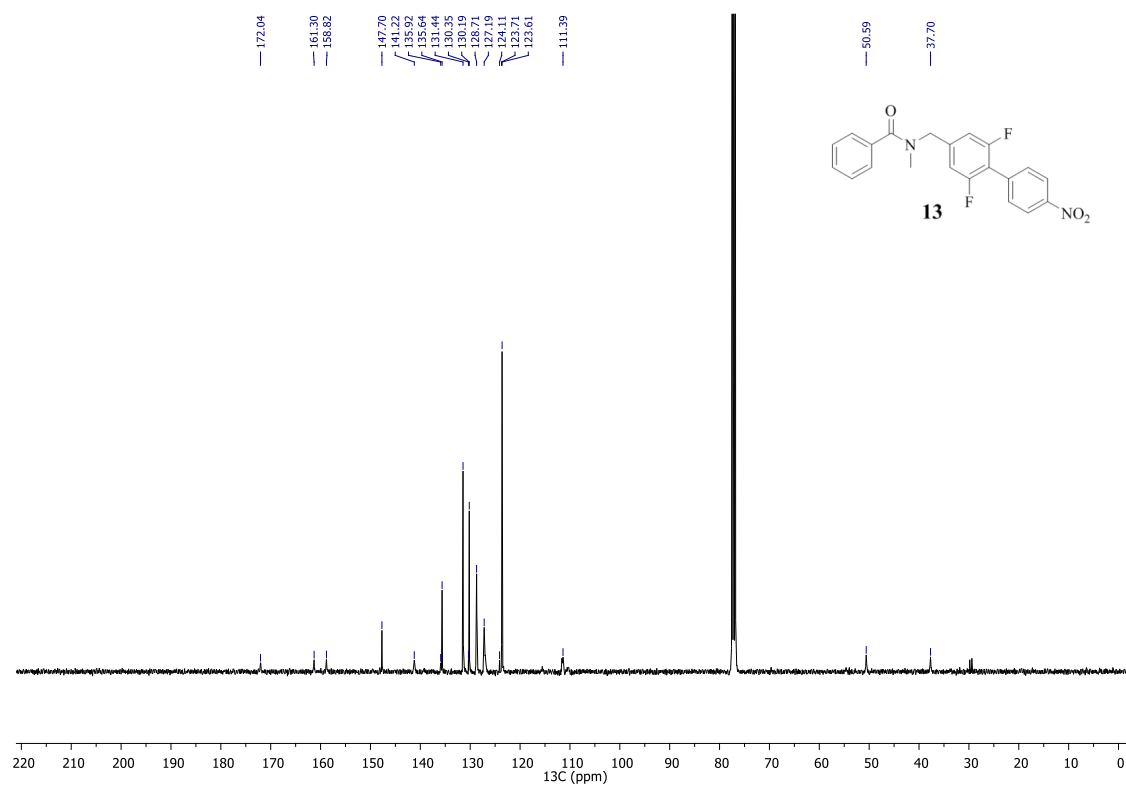

# $^1\text{H}$ and $^{13}\text{C}$ NMR spectra of **14**

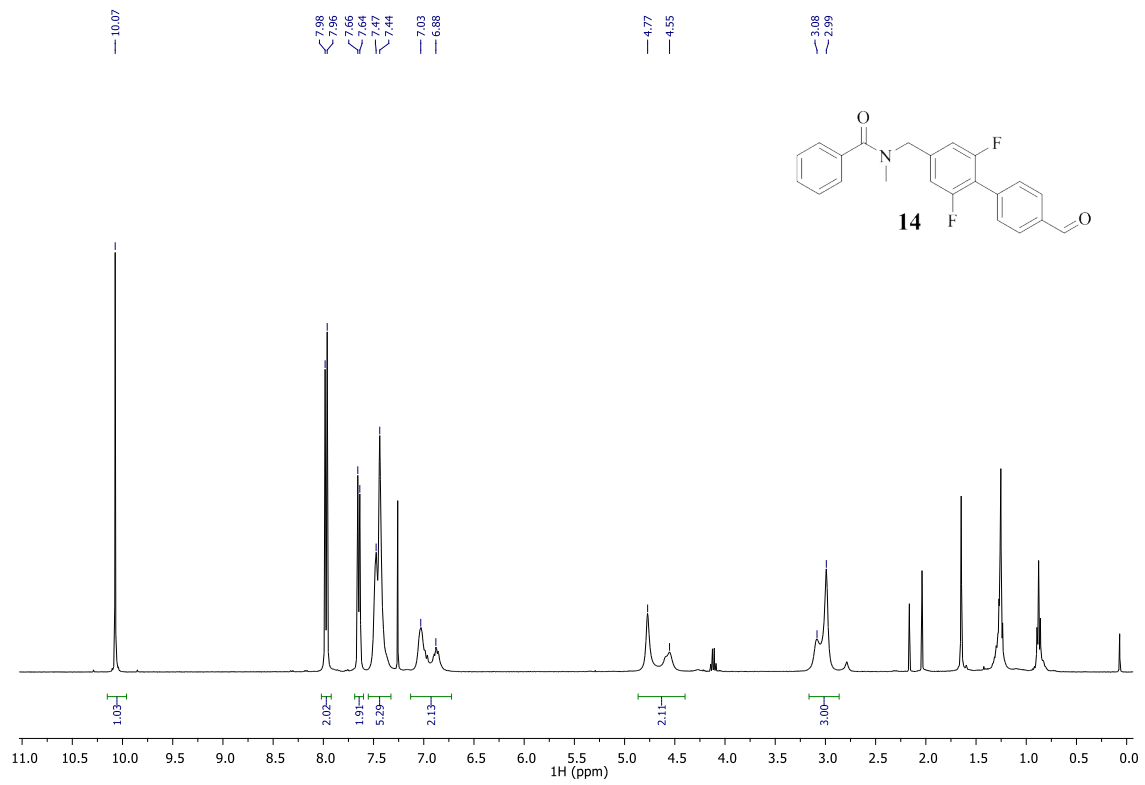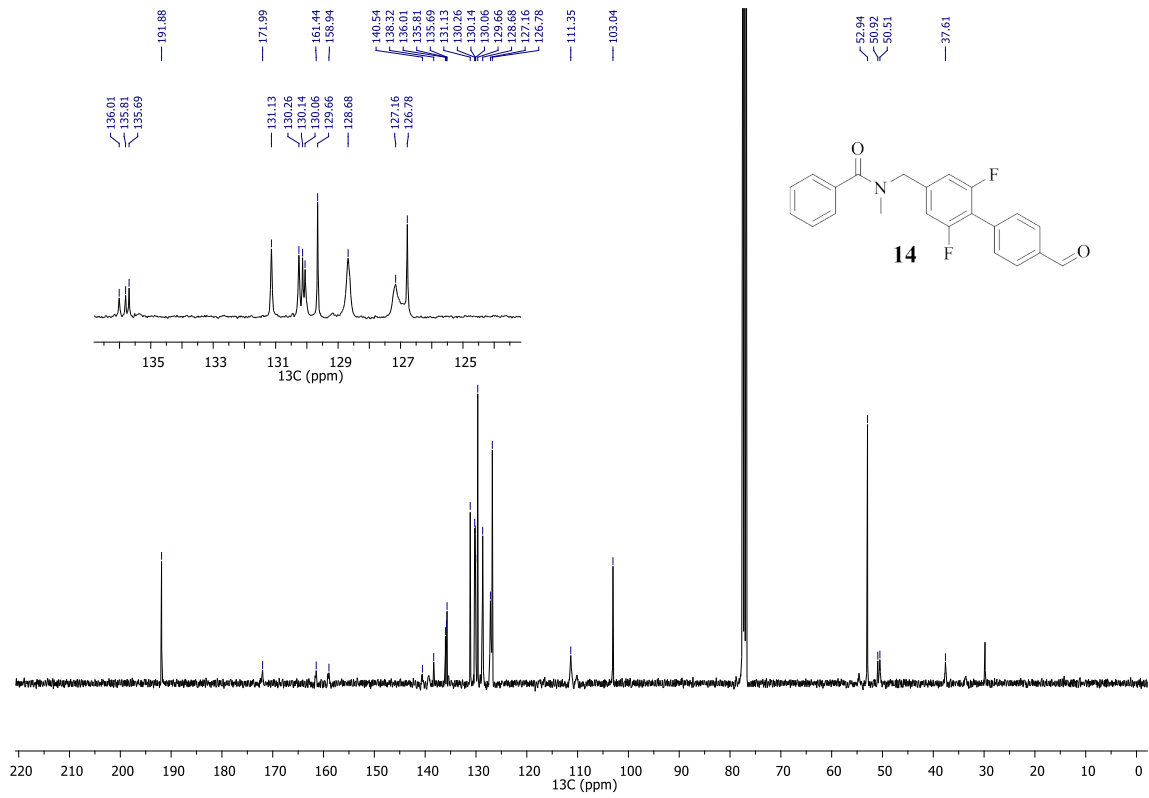

# $^1\text{H}$ and $^{13}\text{C}$ NMR spectra of **15**

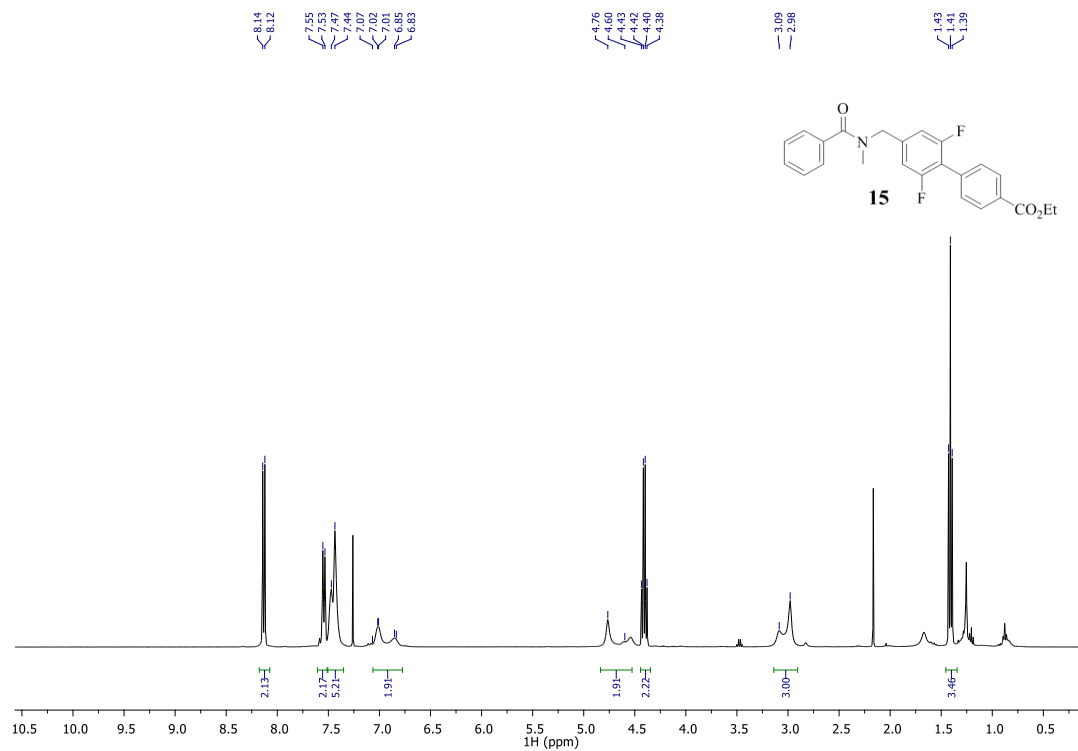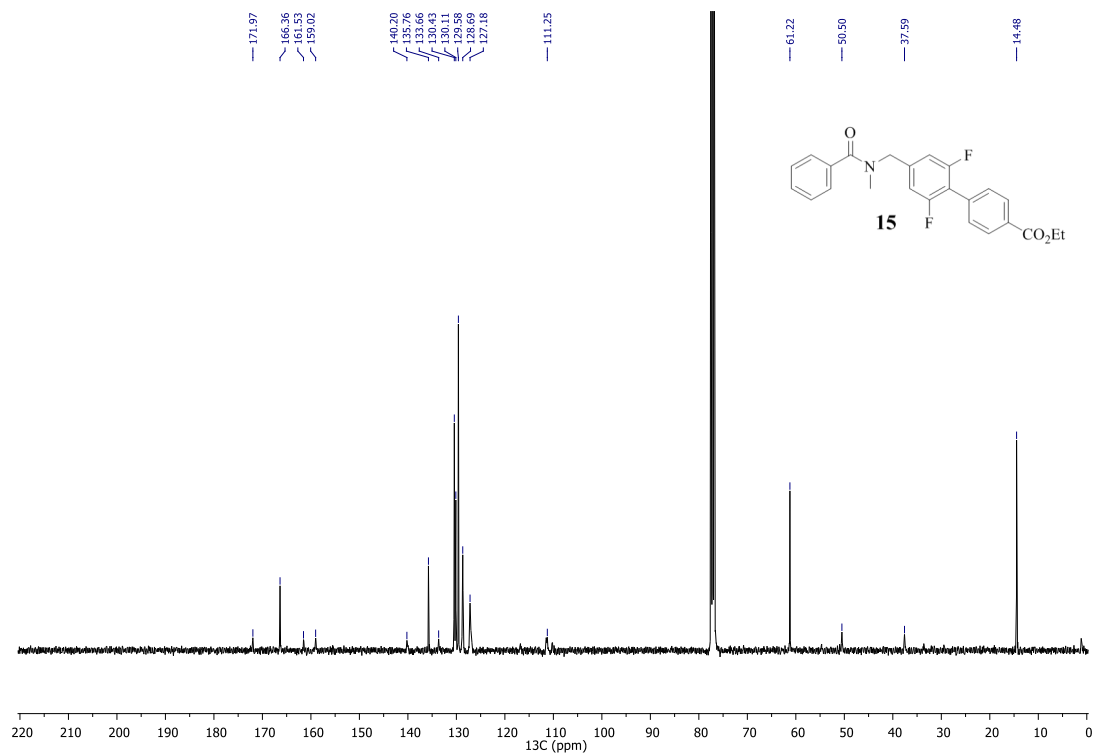

# $^1\text{H}$ and $^{13}\text{C}$ NMR spectra of **16**

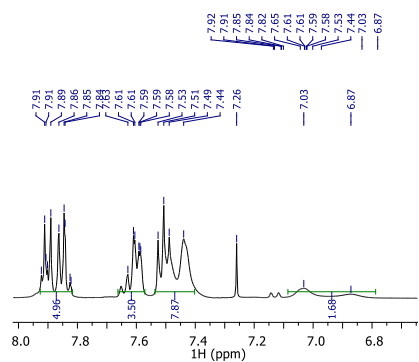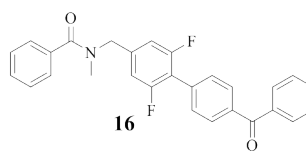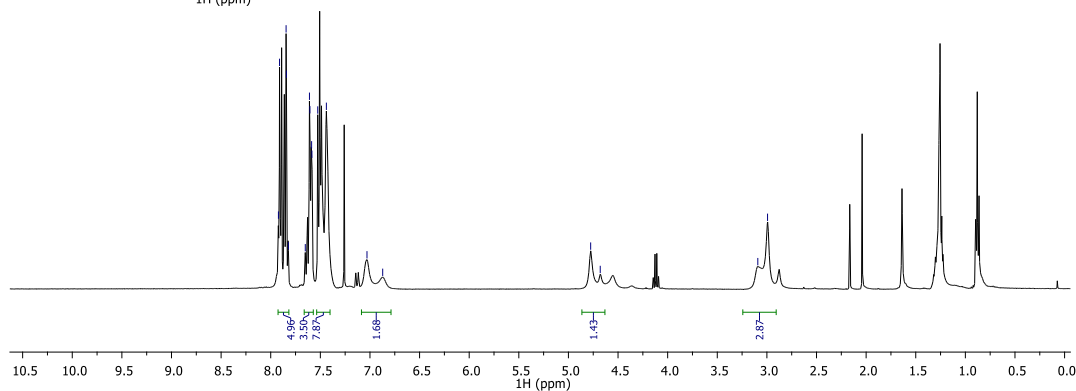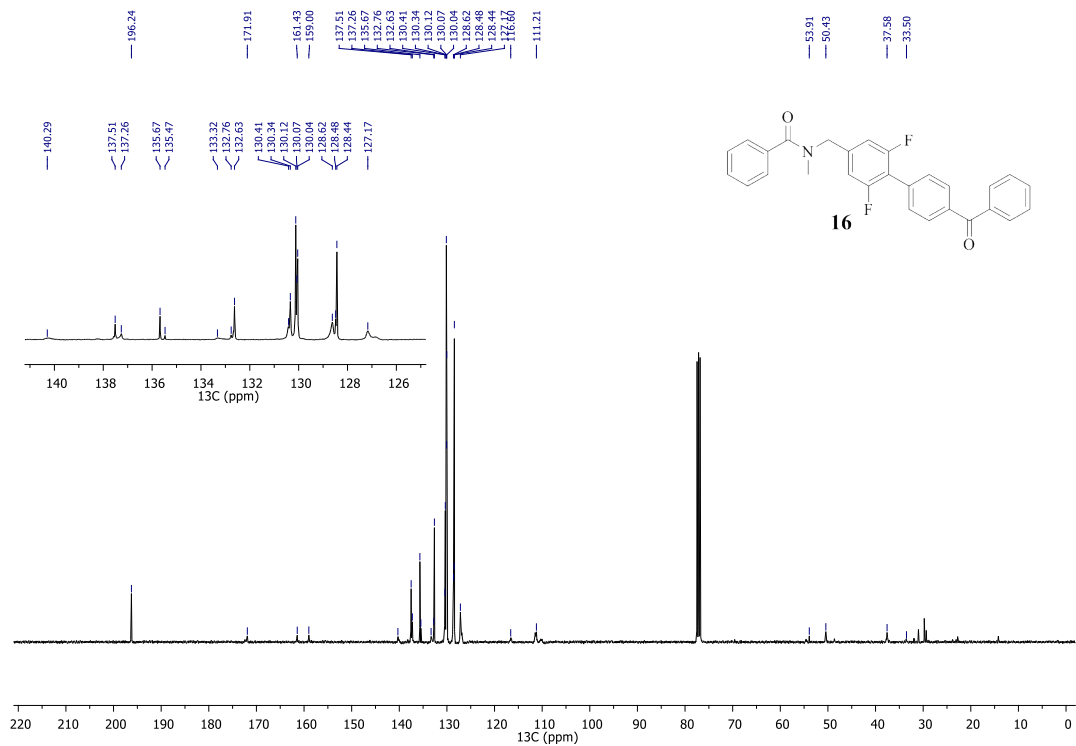

# $^1\text{H}$ and $^{13}\text{C}$ NMR spectra of **17**

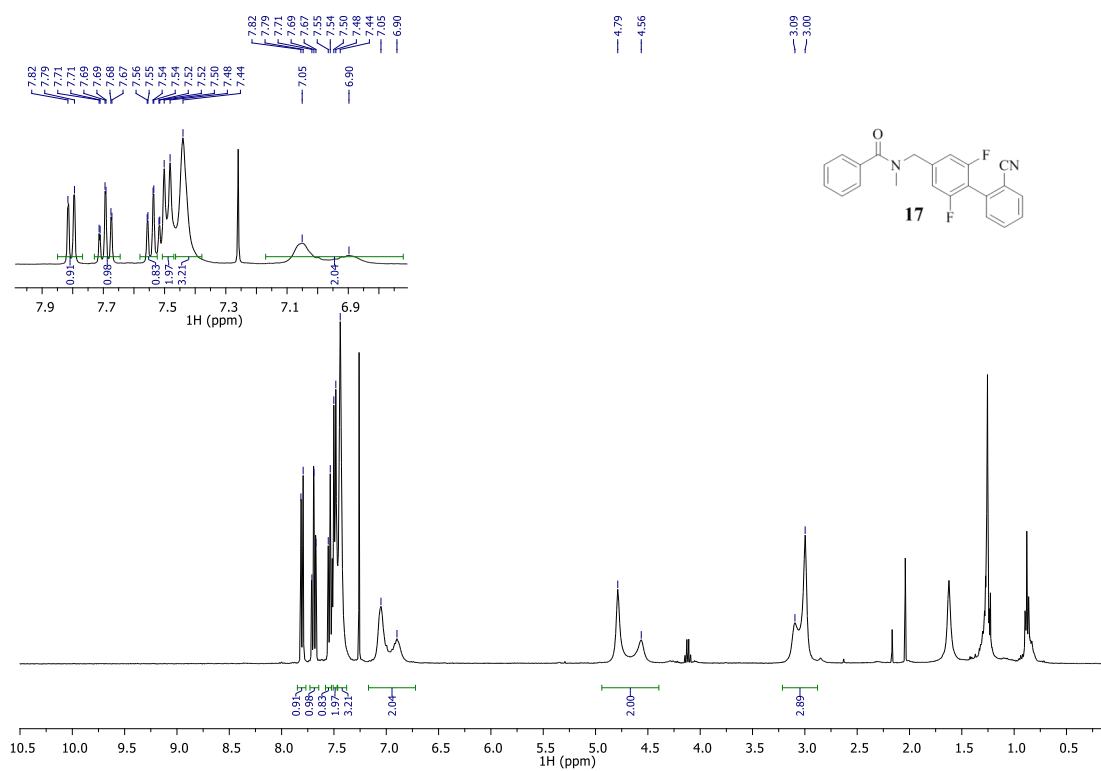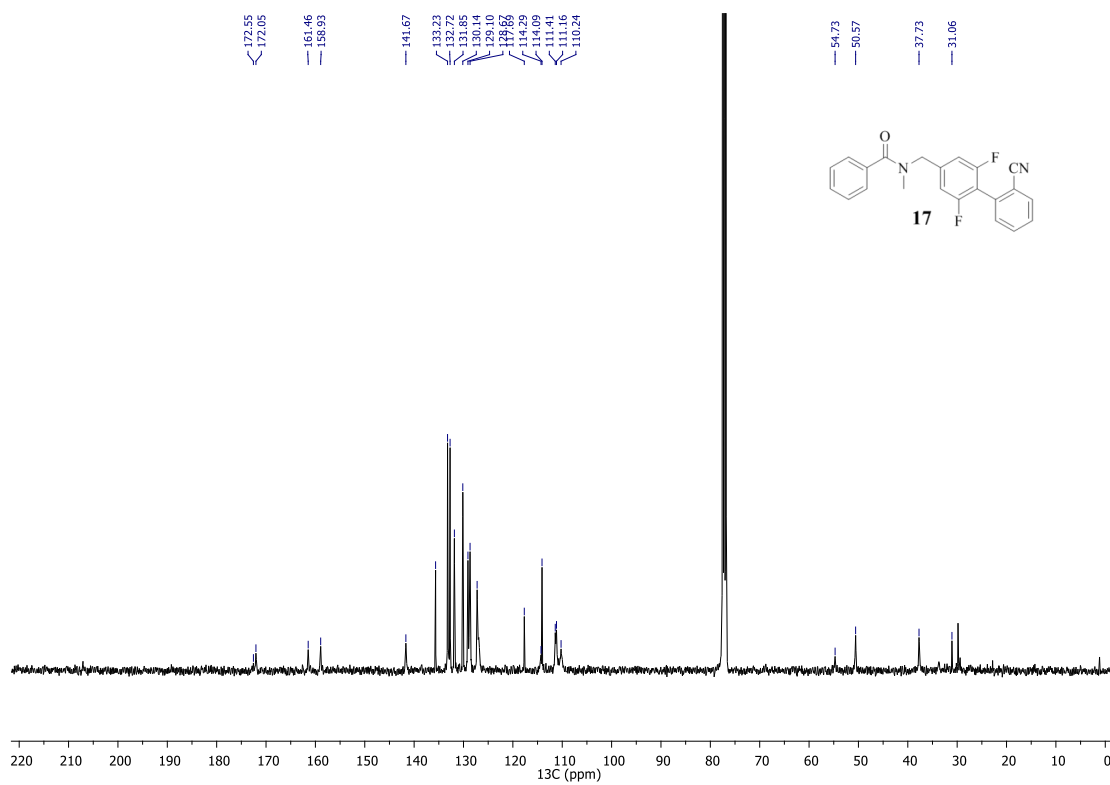

# $^1\text{H}$ and $^{13}\text{C}$ NMR spectra of **18**

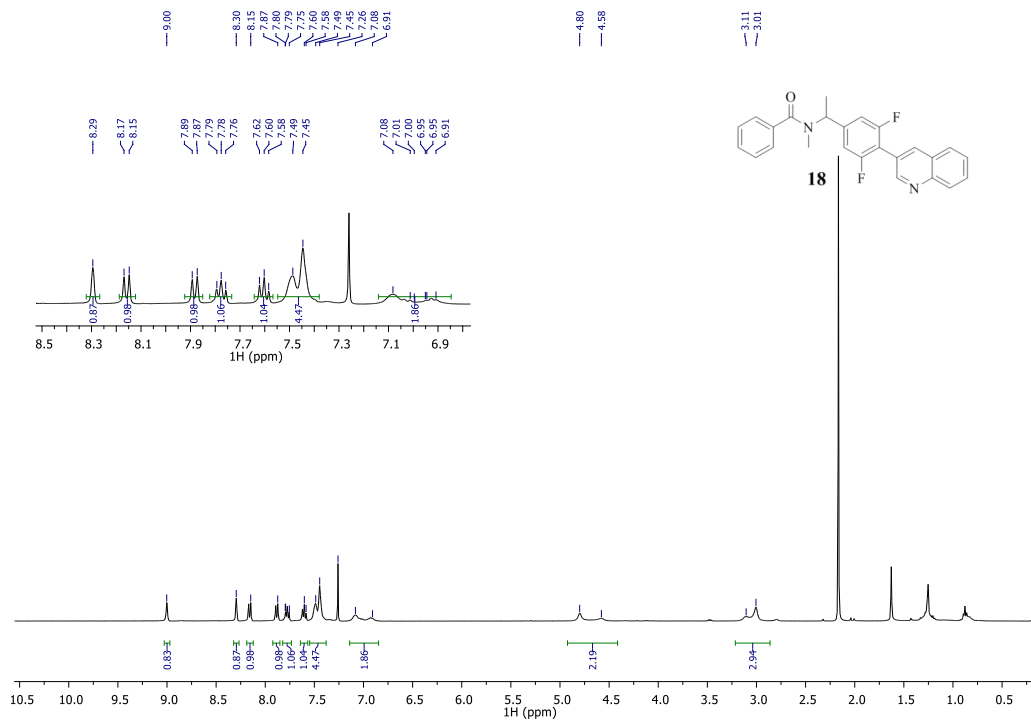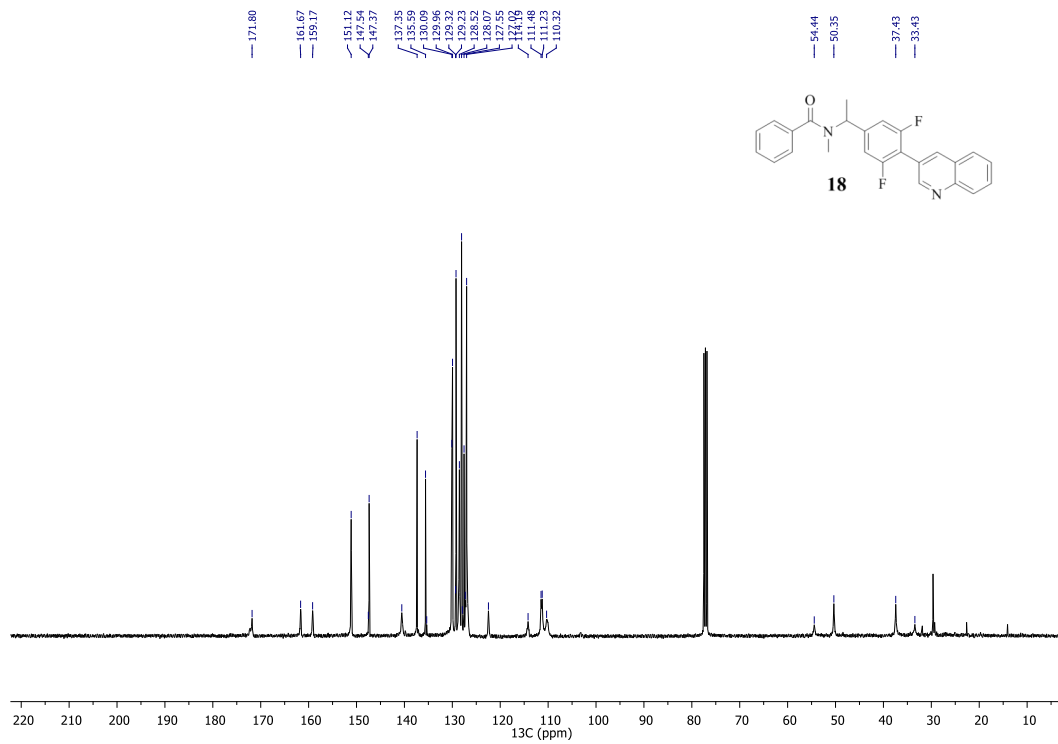

# $^1\text{H}$ and $^{13}\text{C}$ NMR spectra of **19**

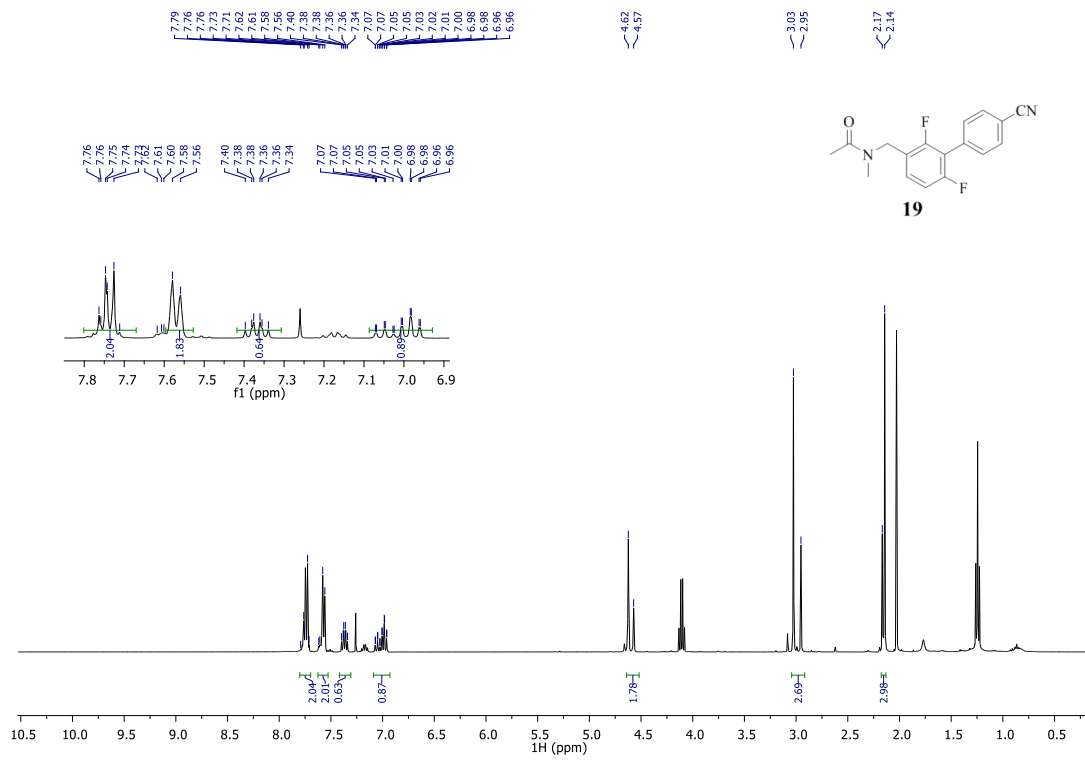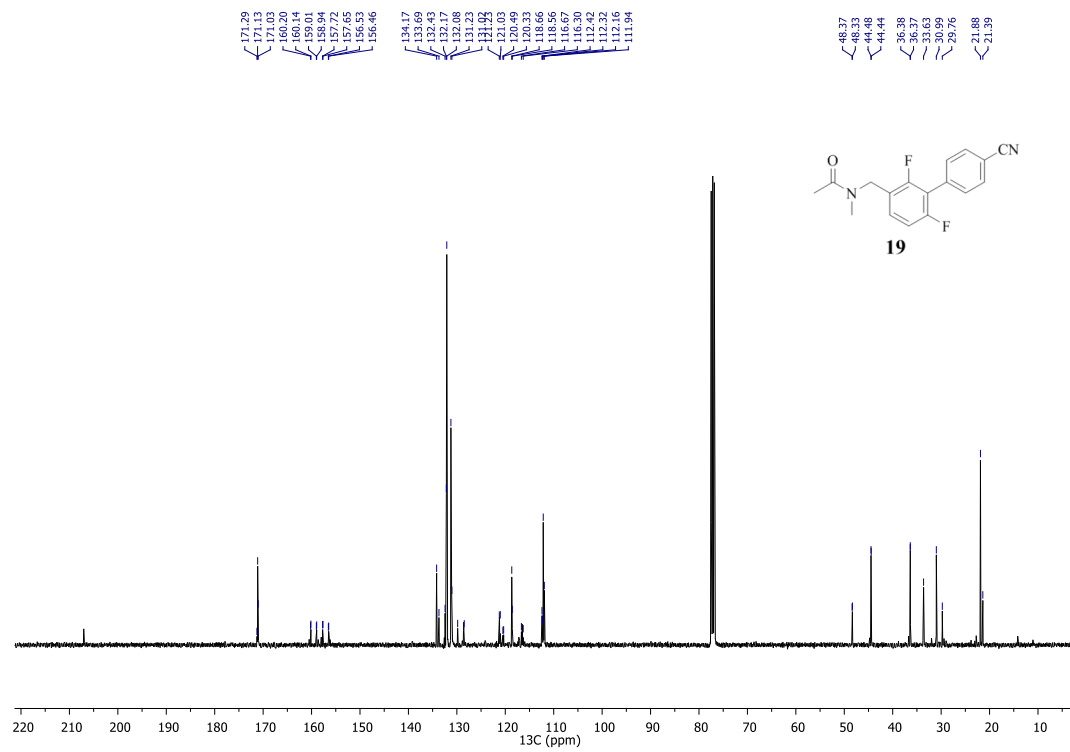



# $^1\text{H}$ and $^{13}\text{C}$ NMR spectra of **20**

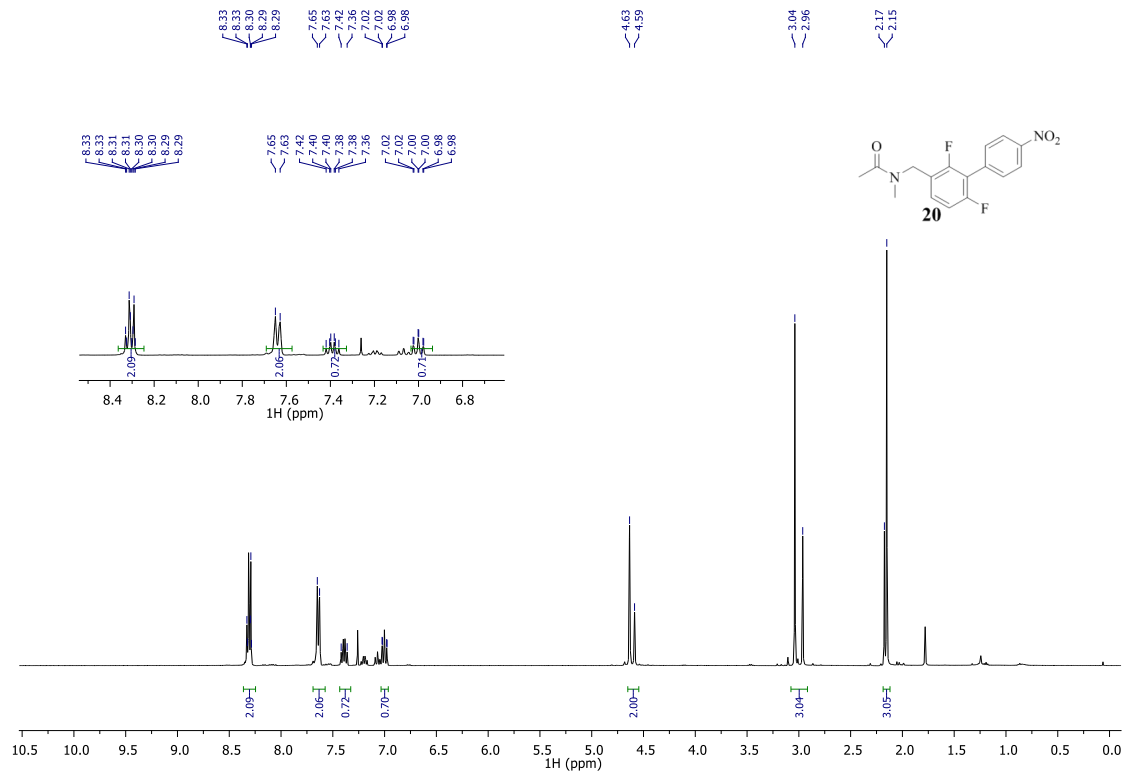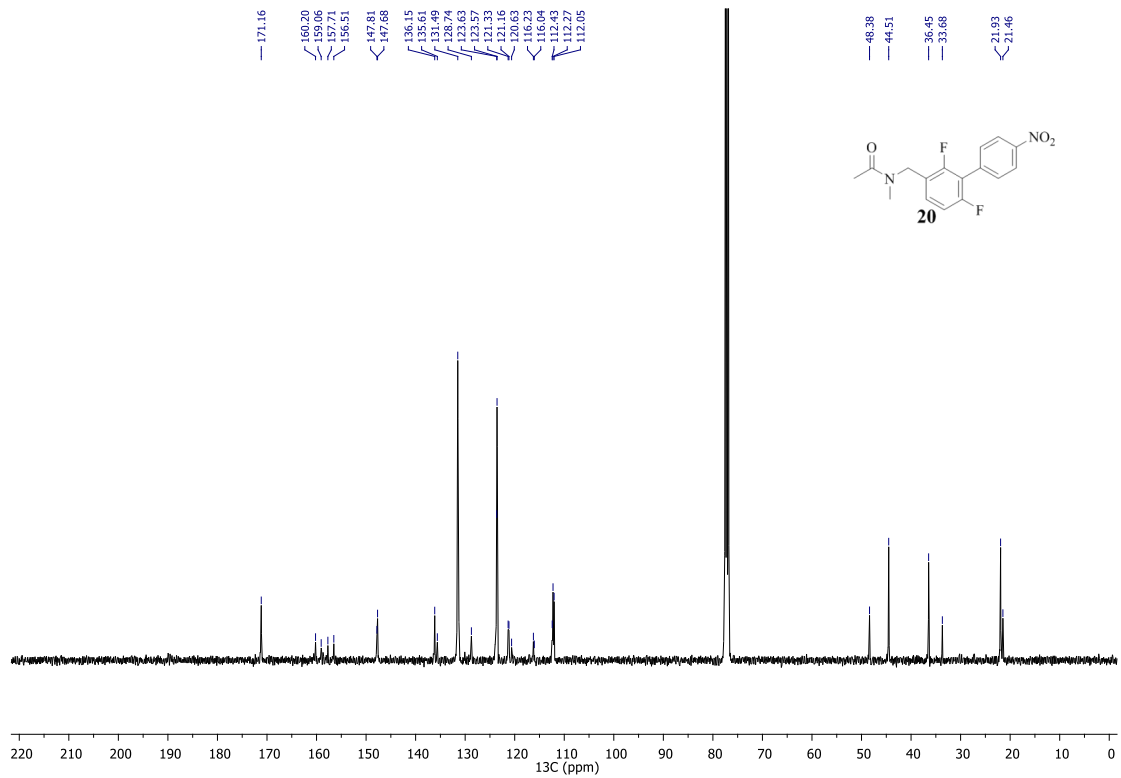

# $^1\text{H}$ and $^{13}\text{C}$ NMR spectra of **21**

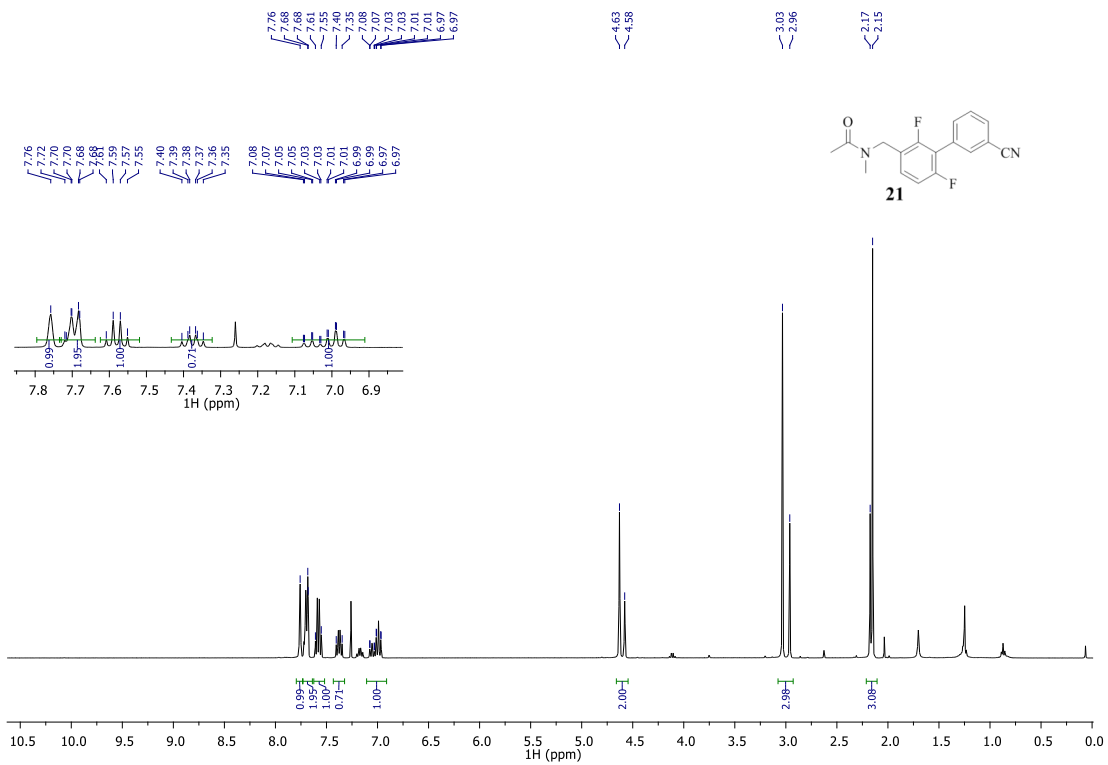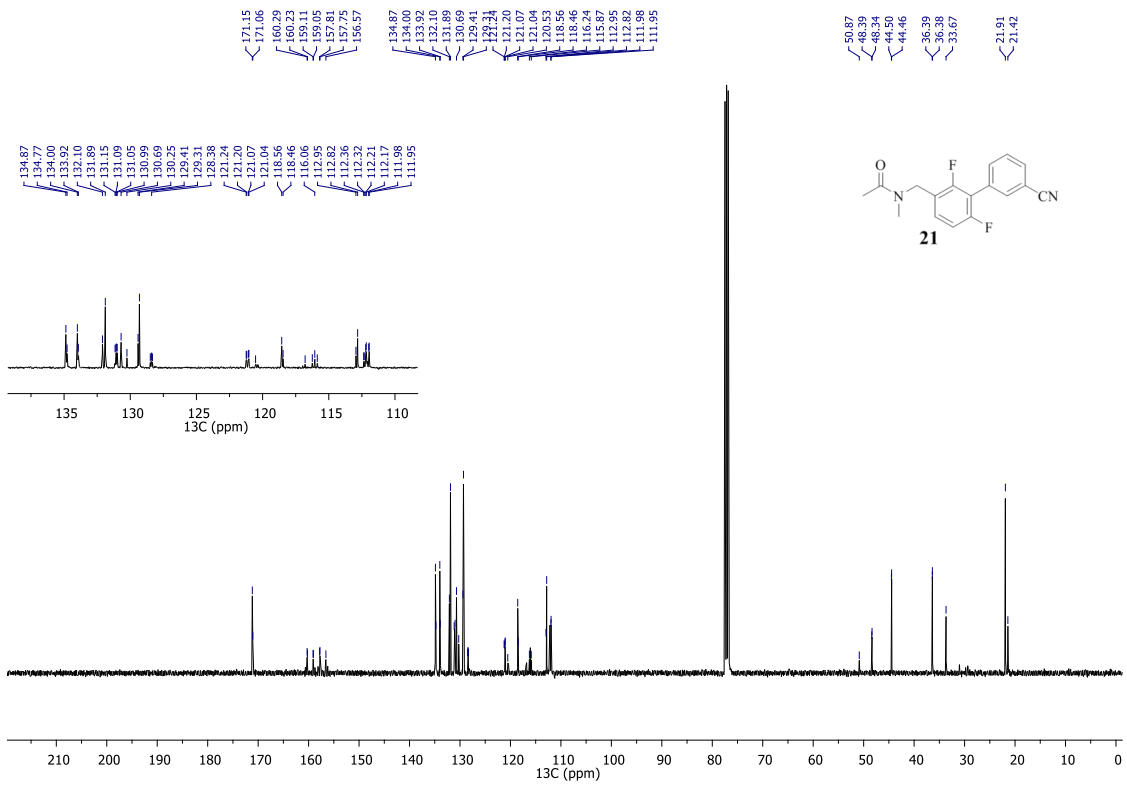

# $^1\text{H}$ and $^{13}\text{C}$ NMR spectra of **22**

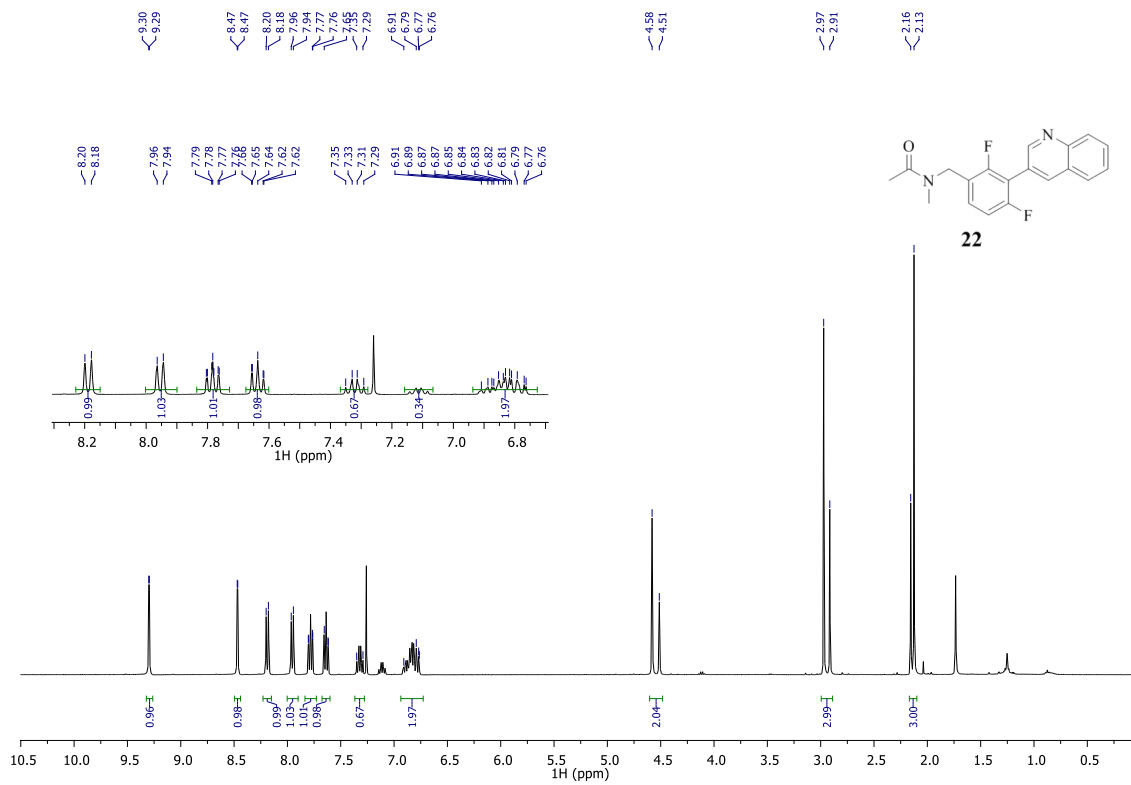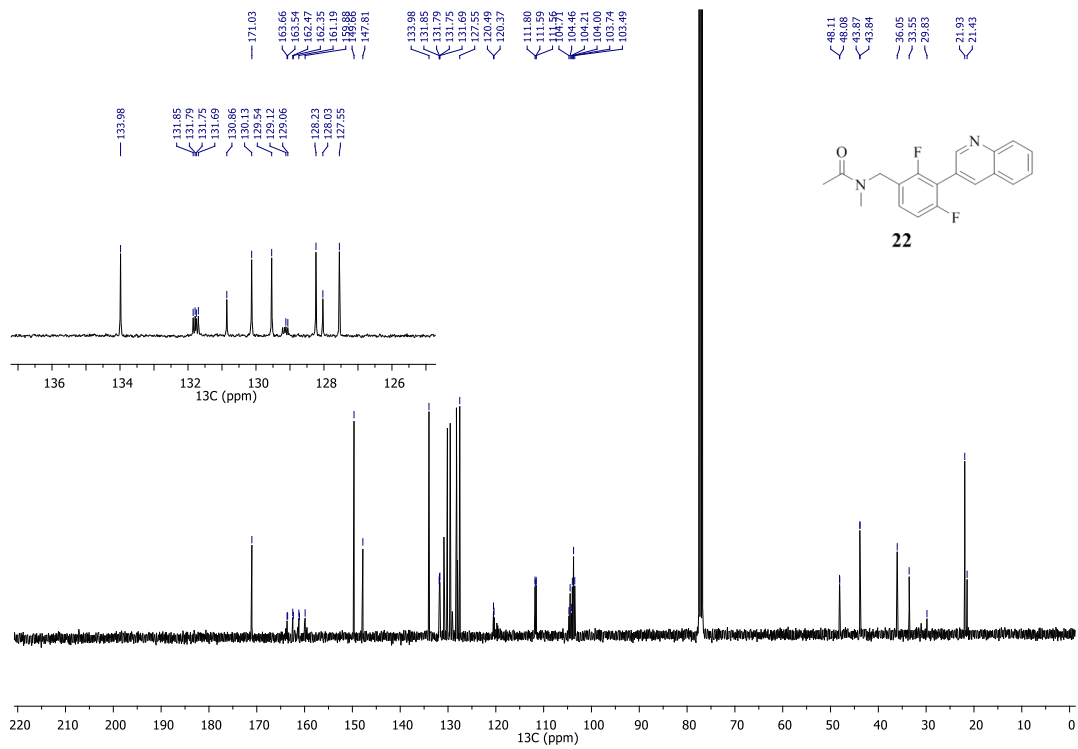

Supplement: mmc1 [file mmc1.pdf]
